# Supplementary material for: Conversational AI Tools for Environmental Topics: A Comparative Analysis of Different Tools and Languages for Microplastics, Tire Wear Particles, Engineered Nanoparticles and Advanced Materials
Source: MDPI journal article supplement (doi:10.3390/su151914453), 2023-10-03
Supplement: s1 [file s1]

# **Conversational AI Tools for Environmental Topics: A Comparative Analysis of Different Tools and Languages for Microplastics, Tire Wear Particles, Engineered Nanoparticles and Advanced Materials**

**Merve Tunali \*, Hyunjoo Hong, Luis Mauricio Ortiz-Galvez, Jimeng Wu, Yiwen Zhang,  
David Mennekes, Barbora Pinlova, Danyang Jiang, Claudia Som and Bernd Nowack**

Empa, Swiss Federal Laboratories for Materials Science and Technology, Technology and  
Society Laboratory, Lerchenfeldstrasse 5, 9014 Sankt Gallen, Switzerland

**Supplementary Information**

Table S1. Questions asked in other languages on microplastics.

| Number | Questions                                                                                             | Level of the question |
|--------|-------------------------------------------------------------------------------------------------------|-----------------------|
| Q5     | Toprakta mikroplastik konsantrasyonu nedir? 200 kelime ile sınırla.                                   | Turkish               |
| Q6     | Bir lastik parçacığı nelerden oluşur? 200 kelime ile sınırla.                                         | Turkish               |
| Q9     | Lastik parçacıklarının tarım toprakları üzerinde riski nedir? 200 kelime ile sınırla.                 | Turkish               |
| Q5     | 토양의 마이크로 플라스틱 농도가 얼마야?                                                                                | Korean                |
| Q6     | 타이어 입자 구성은 뭐야?                                                                                        | Korean                |
| Q9     | 타이어 마모입자가 농업용 토양에 미치는 위해성에 대해 말해줘                                                                     | Korean                |
| Q5     | 土壤中的微塑料浓度是多少？请在200字以内回答。                                                                              | Chinese               |
| Q6     | 轮胎颗粒由什么构成？请在200字以内回答。                                                                                 | Chinese               |
| Q9     | 轮胎磨损颗粒对农业土壤造成了怎样的风险？请在200字以内回答。                                                                       | Chinese               |
| Q6     | What is the concentration of MPs in soils? Limit to 200 words.                                        | German                |
| Q5     | Woraus besteht Reifenabrieb? Limit 200 Wörter                                                         | German                |
| Q9     | Sag mir, was das Risiko von Reifenabrieb auf landwirtschaftlich genutzten Böden ist? Limit 200 Wörter | German                |
| Q5     | ¿Cuál es la concentración de microplásticos en suelos? Limita a 200 palabras.                         | Spanish               |
| Q6     | ¿De qué consiste una partícula de neumático? Limita a 200 palabras.                                   | Spanish               |
| Q9     | Dime los riesgos de partículas de desgaste de neumáticos en suelos agrícolas. Limita a 200 palabras.  | Spanish               |

Table S2. Questions asked to other tools on microplastics.

| Number | Questions                                                                                |
|--------|------------------------------------------------------------------------------------------|
| Q4     | What is the difference between primary and secondary MPs? Limit to 200 words.            |
| Q5     | What is the concentration of MPs in soils? Limit to 200 words.                           |
| Q8     | How to calculate the release of tire wear particles from a car ride? Limit to 200 words. |

Table S3. Microplastic concentration in soils. *Data obtained from different tools and languages, and examples from the literature.*

| Tool                 | Microplastic concentration (part/kg) | Language                         | Data detail if available                          | Reference                 |
|----------------------|--------------------------------------|----------------------------------|---------------------------------------------------|---------------------------|
| ChatGPT              | 1.00E+00                             | English                          | example: agricultural soils in Europe             | -                         |
| ChatGPT              | 1.00E+01                             | English                          | example: agricultural soils in Europe             | -                         |
| ChatGPT              | 3.70E+01                             | English                          | example: urban soils in China                     | -                         |
| ChatGPT              | 4.40E+02                             | English                          | example: urban soils in China                     | -                         |
| ChatGPT              | 2.00E+02                             | Korean                           | reported as: "between these values"               | -                         |
| ChatGPT              | 3.00E+02                             | Korean                           |                                                   | -                         |
| ChatGPT              | 2.00E+03                             | Spanish                          | reported as: "between these values"               | -                         |
| ChatGPT              | 6.00E+03                             | Spanish                          |                                                   | -                         |
| ChatGPT              | 1.00E+02                             | Turkish                          | reported as: "between these values"               | -                         |
| ChatGPT              | 1.00E+04                             | Turkish                          |                                                   | -                         |
| ChatGPT              | 3.80E+01                             | Chinese                          | example:urban soils                               | -                         |
| ChatGPT              | 2.00E+01                             | Chinese                          | example: natural soils                            | -                         |
| ChatGPT              | 3.00E+02                             | Chinese                          | example: European soils                           | -                         |
| ChatGPT              | 4.40E+02                             | Chinese                          | example: North American soils                     | -                         |
| ChatGPT              |                                      | German/no numeric value provided |                                                   | -                         |
| Bard                 | 1.00E+02                             | English                          | reported as: "between these values"               | -                         |
| Bard                 | 1.00E+04                             | English                          |                                                   | -                         |
| Bard                 | 1.00E+05                             | English                          | maximum value                                     | -                         |
| Bing                 | 1.58E+02                             | English                          | example: fields with plastic mulching application | -                         |
| Bing                 | 1.30E+04                             | English                          | maximum value                                     | -                         |
| Data from literature | 0.00E+00                             | English                          | example: urban soils in China                     | Chai et al. (2020)        |
| Data from literature | 4.49E+02                             | English                          | example: urban soils in China                     | Chen et al. 2019          |
| Data from literature | 0.00E+00                             | English                          | example: agricultural soils in Europe             | Harms et al., 2021        |
| Data from literature | 8.80E+00                             | English                          | example: agricultural soils in Europe             | Harms et al. 2021         |
| Data from literature | 3.20E+03                             | English                          | example: agricultural soils in Europe             | Isari et al., 2021        |
| Data from literature | 9.30E+02                             | English                          | median value from the literature                  | Tunali et al. 2023        |
| Data from literature | 4.10E+05                             | English                          | maximum value from literature*                    | Zhou et al. 2019          |
| Data from literature | 3.58E+02                             | English                          | example: North American soils                     | Crossman et al. 2020      |
| Data from literature | 3.01E+02                             | English                          | example: European soils                           | Scheurer and Bigalke 2018 |

\*based on the studies done till August, 2021.

## Section S1. General Content

### S1.1. Microplastics

*Q1. Give information on the sources of microplastics? Limit to 200 words.*

Microplastics are small plastic particles that measure less than 5mm in diameter. They can come from various sources and can be found in a range of environments, from freshwater systems to oceans, soil, and even in the air. The sources of microplastics can be divided into two categories: primary and secondary sources.

Primary sources of microplastics are tiny plastic particles that are intentionally produced and added to personal care and cosmetic products such as exfoliating scrubs, toothpaste, and shower gels. They are also added to cleaning products, paints, and textiles. These microplastics can be released into the environment through the disposal of these products or through sewage systems.

Secondary sources of microplastics are the result of the breakdown of larger plastic items such as plastic bags, water bottles, and fishing nets. Over time, these larger plastic items break down into smaller fragments through the process of photodegradation, mechanical weathering, and biological degradation. These fragments can enter the environment through littering, poor waste management practices, or accidental spillage.

Additionally, microfibers from synthetic clothing can also be a source of microplastics. When synthetic fabrics such as polyester or nylon are washed, they shed tiny fibers that can end up in wastewater systems and ultimately in oceans and freshwater systems.

In conclusion, microplastics come from a range of sources, both primary and secondary. While some of these sources are intentional, others are unintentional and often the result of poor waste management practices. It is important to manage plastic waste effectively to prevent the accumulation of microplastics in the environment.

*Q2. Are MPs a threat to freshwater, marine water and soils? Limit to 200 words.*

Yes, microplastics (MPs) are a significant threat to freshwater, marine water, and soils. As small plastic particles, MPs can easily enter and accumulate in these environments, posing risks to both the environment and human health.

In freshwater systems, MPs can negatively impact aquatic ecosystems by interfering with the food chain and affecting the behavior and reproduction of aquatic organisms. They can also reduce the quality of drinking water and affect human health by potentially introducing toxic chemicals and pathogens.

In marine water, MPs can have a range of negative impacts, including ingestion by marine organisms, entanglement, and habitat destruction. MPs can also transport harmful pollutants and toxins, which can accumulate in the food chain and potentially affect human health.

In soils, MPs can interfere with soil fertility and structure, affecting plant growth and potentially reducing crop yields. MPs can also transport toxic chemicals and heavy metals, which can potentially contaminate soil and groundwater and affect human health.

Overall, MPs pose significant threats to the health of freshwater, marine, and soil ecosystems, as well as to human health. It is crucial to address this issue by reducing the amount of plastic waste that enters the environment, improving waste management practices, and developing innovative solutions to remove MPs from these environments.

*Q3. How is it possible to remove microplastics from oceans? Limit to 200 words.*

There are several ways to remove microplastics from oceans, but none of them are currently considered to be fully effective or economically feasible on a large scale. Some methods include:

1. Skimming: This involves using nets or filters to skim the surface of the ocean to collect floating microplastics.
2. Sorbent materials: Materials such as activated carbon or oil-absorbing polymers can be used to absorb microplastics from seawater. These materials can be used in specially designed filters or booms.
3. Electrostatic attraction: A device can be used to create an electric field that attracts and captures microplastics.
4. Ultraviolet light: Ultraviolet light can be used to break down microplastics in seawater, making them easier to remove.
5. Biodegradation: Researchers are exploring the possibility of using microbes or enzymes to degrade microplastics in the ocean.

It is important to note that these methods are still being researched and developed and are not yet widely available or proven to be effective on a large scale. The best approach to address the issue of microplastics in the ocean is to prevent them from entering the ocean in the first place by reducing plastic waste and improving waste management practices.

*Q4. What is the difference between primary and secondary MPs? Limit to 200 words.*

Primary microplastics (MPs) are tiny plastic particles that are intentionally produced and added to products such as personal care and cosmetic products, cleaning products, and textiles. These particles can also be created during industrial processes such as plastic manufacturing or cutting, shaping, and grinding plastic products.

Secondary MPs, on the other hand, are formed as a result of the breakdown of larger plastic items such as plastic bags, water bottles, and fishing nets. Over time, these larger plastic items break down into smaller fragments through the process of photodegradation, mechanical weathering, and biological degradation.

The main difference between primary and secondary MPs is their origin. Primary MPs are intentionally produced, while secondary MPs are the result of the degradation of larger plastic items. Primary MPs tend to be smaller in size than secondary MPs and can be more uniform in shape and composition. Secondary MPs can be a mix of different types of plastic and can vary in size and shape.

Both primary and secondary MPs can have negative impacts on the environment and human health, and it is important to address the issue of plastic pollution by reducing the amount of plastic waste that enters the environment and developing effective solutions to remove MPs from the environment.

**Q5. What is the concentration of MPs in soils? Limit to 200 words.**

The concentration of microplastics (MPs) in soils varies depending on various factors such as the type of soil, land use, and sources of pollution. However, studies have shown that MPs can be found in soils worldwide, with concentrations ranging from a few particles per kilogram to several hundred particles per kilogram.

Research has shown that the highest concentrations of MPs in soils are often found in urban areas, where there is greater human activity and waste production. For example, a study conducted in China found that the concentration of MPs in urban soils was significantly higher than in rural soils, with concentrations ranging from 37 to 440 particles per kilogram.

A study conducted in Europe found that MPs were present in agricultural soils, with concentrations ranging from 1 to 10 particles per kilogram. The same study found that the type of plastic found in the soil varied depending on the location, with polyethylene and polypropylene being the most commonly detected plastic types.

While the concentration of MPs in soils may seem relatively low compared to other environments such as oceans, it is still a cause for concern due to the potential impacts on soil fertility and plant growth. It is important to continue research on the sources, distribution, and impacts of MPs in soils and to develop effective strategies to mitigate the issue.

**Q6. What does a tire particle consist of? Limit to 200 words.**

Tire particles, also known as tire wear particles or tire-derived microplastics, are small pieces of rubber that are released from tires as they wear down over time. These particles are a significant source of microplastic pollution in the environment and can enter soil, freshwater, and marine environments.

Tire particles consist primarily of synthetic rubber, which is a polymer made from petrochemicals. Other components of tire particles include carbon black, which is added to tires to improve their strength and durability, and various additives such as plasticizers and antioxidants.

The composition of tire particles can vary depending on the type of tire, the age of the tire, and the conditions under which it is used. For example, winter tires contain more additives to improve their performance in cold temperatures, which can result in a higher concentration of tire particles being released during use.

Studies have also shown that tire particles can contain other potentially harmful substances, such as heavy metals, polycyclic aromatic hydrocarbons (PAHs), and other chemicals used in tire production and maintenance.

Overall, tire particles consist mainly of synthetic rubber, carbon black, and various additives, and can contain potentially harmful substances that can enter the environment and pose risks to human and ecosystem health.

*Q7. What do you think about microfiber release from textiles during washing? Limit to 200 words.*

The release of microfibers from textiles during washing is a significant source of microplastic pollution in the environment. Microfibers are tiny synthetic fibers that shed from clothing, towels, and other textiles during washing and can enter the environment through wastewater.

Studies have shown that microfibers are present in both freshwater and marine environments, where they can be ingested by aquatic organisms and potentially enter the food chain. The impacts of microfibers on ecosystems and human health are still being studied, but there is growing concern about their potential effects.

There are several strategies that can be used to reduce the release of microfibers during washing, such as using washing machines with filters that capture fibers, washing clothes at lower temperatures, and using liquid laundry detergents instead of powder detergents.

While these strategies can help reduce the release of microfibers, it is important to note that they may not be enough to completely eliminate the problem. More research is needed to better understand the sources and impacts of microfibers in the environment and to develop effective solutions to address the issue. In the meantime, individuals can take steps to reduce their own contribution to microfiber pollution by choosing clothing made from natural fibers, reducing the frequency of washing, and using laundry bags designed to capture microfibers.

*Q8. How to calculate the release of tire wear particles from a car ride? Limit to 200 words.*

Calculating the release of tire wear particles from a car ride involves several factors, including the distance driven, the type of tire, and the road surface. There are a few different methods that can be used to estimate the release of tire wear particles from a car ride, including mass balance modeling, field measurements, and laboratory simulations.

One method of estimating tire wear particle release is to use mass balance modeling, which involves calculating the mass of the tire tread that is lost during a car ride and estimating the number and size of particles that are released as a result. This method requires information about the tire composition, road surface, and driving conditions, and can be used to estimate the total mass and number of particles released over a given distance or time period.

Another method involves conducting field measurements to collect and analyze tire wear particles from roads and other surfaces. This method provides more accurate data on the size, shape, and composition of tire wear particles, but is more time-consuming and expensive than modeling.

Finally, laboratory simulations can be used to study the release of tire wear particles under controlled conditions. These simulations involve placing tires on a rotating drum and measuring the amount and size of particles released during simulated driving conditions.

Overall, estimating the release of tire wear particles from a car ride requires a combination of field measurements, laboratory simulations, and modeling, and involves several complex factors that can influence the release of particles into the environment.

*Q9. Tell me the risk of tire-wear particles on agricultural soils? Limit to 200 words.*

Tire-wear particles can pose a risk to agricultural soils by introducing microplastics and other potentially harmful substances into the soil ecosystem. These particles can enter agricultural soils through several pathways, including runoff from roads, direct deposition from the atmosphere, and the use of compost or other organic materials that contain tire particles.

Studies have shown that tire-wear particles can affect soil properties such as soil structure, porosity, and water-holding capacity, which can have negative impacts on plant growth and nutrient uptake. In addition, the presence of tire-wear particles in soil can also lead to the accumulation of potentially harmful substances such as heavy metals and polycyclic aromatic hydrocarbons (PAHs), which can pose risks to human health and the environment.

Furthermore, the use of compost or other organic materials that contain tire particles can also introduce these substances into agricultural soils, potentially leading to long-term accumulation and persistence in the soil ecosystem.

Overall, the risk of tire-wear particles on agricultural soils is an emerging issue that requires further research and monitoring to better understand the potential impacts on soil health, plant growth, and human health. It is important to explore strategies to reduce the release of tire-wear particles into the environment and to mitigate their potential effects on agricultural soils and ecosystems.

## **S1.2. Engineered Nanomaterials and Advanced Materials**

*Q1. How can we distinguish between engineered nanomaterials, natural nanomaterials and bulk-derived nanomaterials? Limit to 200 words.*

Distinguishing between engineered nanomaterials, natural nanomaterials, and bulk-derived nanomaterials can be challenging, but certain characteristics can help differentiate them.

Engineered nanomaterials are deliberately designed and synthesized for specific applications. They possess unique properties and structures that are not found in nature. They are typically created through precise manufacturing processes and often have well-defined sizes, shapes, and compositions.

Natural nanomaterials occur naturally in the environment, such as minerals, proteins, and viruses. They can have complex structures and compositions, but their formation is independent of human intervention. Examples include naturally occurring nanoparticles like clay minerals or carbon nanotubes found in volcanic ash.

Bulk-derived nanomaterials are derived from bulk materials through mechanical, chemical, or thermal processes. They are produced by breaking down larger materials into smaller nanoparticles. While their sizes may fall within the nanoscale range, their structures and properties are generally similar to the parent materials, lacking the unique properties associated with engineered nanomaterials.



To differentiate between these types, techniques such as microscopy (electron microscopy, atomic force microscopy), spectroscopy (UV-Vis, Raman), and diffraction (XRD) can be employed. Additionally, examining the origin, manufacturing methods, and composition can provide valuable insights into their categorization.

It's important to note that categorization is not always straightforward, as some materials may exhibit properties of more than one category. Therefore, a combination of analytical techniques and understanding the manufacturing processes is crucial for accurate identification and classification.

*Q2. What is the presence of AdMas in the environment?*

The presence of advanced materials in the environment is a significant and evolving issue. Advanced materials refer to a wide range of engineered substances that possess enhanced properties, such as increased strength, durability, or functionality, compared to traditional materials. These materials are designed to revolutionize various industries, including electronics, construction, transportation, and energy.

While advanced materials offer numerous benefits, their presence in the environment raises concerns. One primary concern is the disposal and recycling of these materials. Many advanced materials contain complex chemical compositions that can be challenging to break down or recycle, leading to potential accumulation in landfills or release into ecosystems.

Additionally, the production and manufacturing processes of advanced materials often involve the use of energy-intensive and environmentally damaging methods. This can contribute to increased greenhouse gas emissions, water pollution, and depletion of natural resources.

Furthermore, the long-term impacts of advanced materials on ecosystems and human health are still not fully understood. Some advanced materials may contain hazardous substances or generate toxic byproducts when exposed to certain conditions or at the end of their lifecycle.

To mitigate these challenges, it is crucial to develop sustainable practices for the production, use, and disposal of advanced materials. This includes adopting eco-friendly manufacturing techniques, promoting recycling and circular economy principles, and conducting comprehensive research on the potential environmental impacts of these materials.

In conclusion, the presence of advanced materials in the environment presents both opportunities and challenges. It is essential to strike a balance between technological advancements and environmental stewardship to ensure the responsible and sustainable use of these materials.

*Q3. What is an antimicrobial coating? Limit to 200 words.*

An antimicrobial coating is a specialized type of surface treatment that is designed to inhibit the growth and spread of microorganisms such as bacteria, viruses, fungi, and other harmful pathogens. It is applied to various surfaces, including medical equipment, textiles, building materials, and household items, to create a protective barrier against microbial contamination.

Antimicrobial coatings can be formulated using different active ingredients, such as silver, copper, zinc, or organic compounds, which possess antimicrobial properties. These active agents

work by disrupting the cellular structure of microorganisms, preventing their replication and survival on the treated surface.

The primary objective of antimicrobial coatings is to reduce the risk of infections and improve hygiene in various settings. In healthcare facilities, for instance, these coatings can be applied to frequently touched surfaces like door handles, bedrails, and medical instruments to minimize the transmission of pathogens and decrease the spread of healthcare-associated infections.

Furthermore, antimicrobial coatings find applications in public spaces, such as schools, airports, and public transportation, where large numbers of people come into contact with shared surfaces. They can also be used in food processing and packaging industries to maintain product safety and extend shelf life by inhibiting the growth of spoilage-causing bacteria.

It is important to note that while antimicrobial coatings offer an additional layer of protection against microorganisms, they are not a substitute for regular cleaning and disinfection practices. Proper cleaning protocols should still be followed to maintain a clean and hygienic environment. Additionally, regular monitoring and maintenance of the coating are necessary to ensure its continued effectiveness.

#### *Q4. What are the (released) concentrations of ENMs in surface water?*

The released concentrations of engineered nanomaterials (ENMs) in surface water can vary depending on various factors such as the type of nanomaterial, its application, and the specific environmental conditions. However, it is important to note that information regarding the exact concentrations of ENMs in surface water is limited and often difficult to ascertain due to the challenges associated with detection and monitoring.

Several studies have been conducted to investigate the presence of ENMs in surface water, but the reported concentrations have been relatively low. In general, these concentrations are typically in the range of nanograms to micrograms per liter. However, it is important to consider that the actual concentrations can vary significantly depending on the specific study and sampling location.

The release of ENMs into surface water can occur through various pathways, including industrial discharges, wastewater effluents, and runoff from nanomaterial-treated surfaces. However, the extent of ENM release and subsequent concentrations in surface water are influenced by factors such as the production volume, usage patterns, and wastewater treatment practices.

As the field of nanotechnology continues to advance, efforts are being made to better understand the environmental fate and behavior of ENMs, including their presence in surface water. Monitoring and research initiatives aim to improve our understanding of the potential risks associated with ENM exposure and develop appropriate regulatory frameworks to ensure their responsible use.

In conclusion, while information on the released concentrations of engineered nanomaterials in surface water is limited, available studies suggest relatively low concentrations in the range of nanograms to micrograms per liter. Further research and monitoring are necessary to gain a comprehensive understanding of the presence and behavior of ENMs in aquatic environments.

*Q5. How should society regulate/legislate engineered nanomaterials and nano-enabled products? Limit to 200 words.*

Regulating and legislating engineered nanomaterials and nano-enabled products requires a balanced approach that addresses potential risks while fostering innovation and societal benefits. A comprehensive framework should consider the following principles:

1. Risk assessment and management: Establish robust procedures to evaluate the safety of nanomaterials and their potential impacts on human health and the environment. Encourage research to fill knowledge gaps and develop standardized testing protocols.
2. Labeling and transparency: Implement clear labeling requirements for nano-enabled products to inform consumers about their presence and potential risks. Enhance transparency by promoting public access to safety data and risk assessments.
3. Responsible manufacturing and use: Encourage industries to adopt responsible manufacturing practices that minimize exposure and release of nanomaterials during production, use, and disposal. Promote the development of guidelines and best practices for safe handling, storage, and disposal.
4. International cooperation: Foster international collaboration to harmonize regulations and standards for nanomaterials and nano-enabled products. Facilitate information sharing and collaboration on risk assessment and management approaches to avoid trade barriers and ensure global safety.
5. Ethical considerations: Incorporate ethical considerations into the regulatory framework, addressing issues such as potential impacts on privacy, data security, and equitable access to nanotechnology advancements. Encourage public dialogue and engagement to ensure diverse perspectives are taken into account.
6. Adaptive governance: Establish a flexible regulatory framework that can adapt to rapidly evolving technologies and emerging risks. Encourage ongoing monitoring, evaluation, and updating of regulations based on scientific advancements and stakeholder input.
7. Support for innovation: Foster an environment that encourages responsible innovation in nanotechnology. Provide funding and resources for research and development while promoting collaborations between academia, industry, and regulatory bodies.

Balancing precaution and innovation is key to regulating engineered nanomaterials. A multidisciplinary approach, incorporating scientific expertise, stakeholder engagement, and continuous evaluation, is crucial to ensuring the safe and sustainable development of nanotechnology.

*Q6. Which physico-chemical properties are relevant to categorize Advanced Materials for their environmental risk assessment?*

When categorizing advanced materials for environmental risk assessment, several physico-chemical properties are relevant. These properties help in understanding the potential environmental impact and risk associated with the materials. Some important physico-chemical properties for environmental risk assessment include:

1. **Toxicity:** The toxicity of advanced materials refers to their ability to cause harm or adverse effects on living organisms and ecosystems. Toxicity can be assessed through various tests, such as acute and chronic toxicity tests on aquatic organisms or cell cultures.
2. **Persistence:** Persistence refers to the resistance of a material to degradation or breakdown in the environment. Highly persistent materials can persist for longer periods, leading to potential accumulation and long-term exposure risks.
3. **Bioaccumulation:** Bioaccumulation refers to the accumulation of a material in the tissues of organisms over time. Materials that are prone to bioaccumulation can pose risks as they can enter the food chain and reach higher concentrations in organisms at higher trophic levels.
4. **Mobility:** Mobility refers to the ability of a material to move or be transported within the environment. Materials with high mobility can spread over larger areas and potentially contaminate different environmental compartments such as soil, water, or air.
5. **Solubility:** Solubility refers to the ability of a material to dissolve in a solvent, usually water. Highly soluble materials can easily disperse in the environment, increasing the potential for exposure and distribution.
6. **Reactivity:** Reactivity refers to the tendency of a material to undergo chemical reactions with other substances in the environment. Reactive materials may form new compounds or release potentially harmful byproducts during reactions, which can impact ecosystems and human health.
7. **Particle size:** Particle size plays a role in determining the behavior and fate of materials. Nanoparticles, for example, can exhibit unique properties and behaviors, potentially affecting their environmental interactions and risks.

It's important to note that the relevance and significance of these properties may vary depending on the specific material, its application, and the potential exposure pathways. A comprehensive assessment of advanced materials for environmental risk requires considering these physico-chemical properties in conjunction with exposure routes, concentrations, and potential ecological and human health effects.

#### *Q7. How can we apply the SSbD approach in AdMas development?*

The Sustainable-by-Design (SbD) approach is a framework that promotes the integration of sustainability considerations into the development of advanced materials (AdMas) from the early stages of research and design. Here are some ways to apply the SbD approach in AdMas development:

1. **Goal setting:** Define sustainability goals and objectives for the AdMas development process. This involves identifying the desired environmental, social, and economic outcomes that the materials should achieve throughout their life cycle.
2. **Life cycle thinking:** Adopt a life cycle perspective when assessing AdMas. Consider the environmental and social impacts associated with the raw material extraction, production processes, use phase, and end-of-life disposal. Assessing the entire life cycle helps identify potential hotspots and areas for improvement.

3. Multidisciplinary collaboration: Foster collaboration among researchers, engineers, designers, and stakeholders from various disciplines. This collaborative approach allows for the integration of diverse perspectives and expertise, facilitating the identification of innovative and sustainable solutions.
4. Material selection: Select raw materials with improved sustainability characteristics, such as renewable resources, non-toxic components, or materials with lower environmental impacts. Assess the availability, sourcing practices, and life cycle impacts of the chosen materials.
5. Process optimization: Optimize the manufacturing processes to reduce energy consumption, waste generation, and emissions. Explore cleaner and more efficient production techniques, such as green chemistry principles or advanced recycling technologies.
6. Performance and functionality: Ensure that AdMas meet or exceed the required performance and functionality criteria. Sustainability should not compromise the intended functionality or performance of the materials, as their adoption and market viability depend on meeting user expectations.
7. Durability and longevity: Design AdMas to be durable and have a long service life. Longer-lasting materials reduce the need for frequent replacements, conserving resources and minimizing waste generation.
8. End-of-life considerations: Incorporate strategies for the end-of-life management of AdMas. Design materials that are recyclable, reusable, or biodegradable. Explore options for extended producer responsibility, such as take-back programs or designing for disassembly, to facilitate proper disposal and recycling.
9. Impact assessment and certification: Conduct environmental and social impact assessments of AdMas using established frameworks and standards. Consider certifications, such as eco-labels or environmental product declarations, to communicate the sustainability attributes and achievements of the materials.
10. Continuous improvement: Continuously evaluate and refine the AdMas development process based on feedback, monitoring, and emerging scientific knowledge. Incorporate lessons learned from previous projects and stay updated on technological advancements and best practices in sustainable materials development.

By applying the SbD approach, AdMas can be designed and developed with sustainability as a core consideration, promoting the transition towards more environmentally friendly and socially responsible materials.

*Additional: but SSbD stands for "safe and sustainable by design". Can you answer my question again?*

Apologies for the confusion. The Safe and Sustainable by Design (SSbD) approach focuses on integrating safety considerations along with sustainability principles in the development of advanced materials (AdMas). Here's how you can apply the SSbD approach in AdMas development:

1. Hazard identification: Identify and assess potential hazards associated with AdMas throughout their life cycle. Consider intrinsic properties of the materials, such as toxicity or reactivity, and evaluate their potential risks to human health and the environment.
2. Risk assessment: Conduct a comprehensive risk assessment to quantify and evaluate the potential risks posed by AdMas. This involves considering exposure pathways, potential release scenarios, and the toxicity of the materials. Use this information to prioritize safety measures and identify areas for improvement.
3. Safer material design: Incorporate safer design principles into the development of AdMas. This includes selecting materials with inherently low toxicity or reactivity and minimizing the use of hazardous substances. Consider alternatives to hazardous components and adopt design strategies that reduce potential risks.
4. Predictive modeling and testing: Utilize predictive modeling and testing methods to evaluate the behavior and potential risks of AdMas. Computational tools, such as quantitative structure-activity relationship (QSAR) models, can provide insights into the safety and environmental properties of materials. Experimental testing, such as in vitro or in vivo toxicity assays, can also be employed to assess potential hazards.
5. Exposure control: Implement measures to control and minimize exposure to hazardous materials during AdMas production, use, and disposal. This includes engineering controls, personal protective equipment, and safe handling procedures to reduce the risk of exposure to workers, consumers, and the environment.
6. Communication and labeling: Clearly communicate safety information and potential hazards associated with AdMas through labeling, safety data sheets, and other relevant documentation. This ensures that users, workers, and stakeholders are aware of proper handling, storage, and disposal practices.
7. Regulatory compliance: Ensure that AdMas comply with relevant regulations and standards for safety and sustainability. Stay updated with evolving regulations and guidelines pertaining to material safety and incorporate them into the development process.
8. Training and education: Provide training and education to researchers, developers, and users of AdMas regarding safety considerations. This promotes awareness and understanding of potential hazards and encourages the adoption of safe practices throughout the life cycle of the materials.
9. Continuous improvement and monitoring: Continuously evaluate and improve safety performance through monitoring, feedback, and post-market surveillance. Collect and analyze data on the safety and performance of AdMas to identify areas for refinement and implement necessary changes.

By applying the SSbD approach, AdMas can be developed with a focus on both safety and sustainability, ensuring that potential risks are identified and mitigated throughout the life cycle of the materials.



*Q8. What types of biocides are used for coating purposes? Limit to 200 words.*

Several types of biocides are commonly used for coating purposes to provide antimicrobial properties. These biocides are incorporated into the coating formulation to inhibit the growth and proliferation of microorganisms on the coated surface. Here are some of the commonly used biocides in coatings:

1. **Silver:** Silver-based biocides, such as silver ions or silver nanoparticles, have strong antimicrobial properties and are effective against a broad spectrum of microorganisms. They work by disrupting the cellular processes of bacteria, viruses, and fungi.
2. **Copper:** Copper-based biocides have potent antimicrobial properties and are effective against various microorganisms. Copper ions interfere with microbial cell membranes and DNA, inhibiting their growth and survival.
3. **Zinc:** Zinc-based biocides have both antimicrobial and antifungal properties. They disrupt the metabolic processes of microorganisms, inhibiting their growth and reproduction.
4. **Quaternary Ammonium Compounds (QACs):** QACs are organic compounds that exhibit antimicrobial properties. They are widely used in coatings for their effectiveness against bacteria and some viruses. QACs disrupt the cell membranes of microorganisms, leading to their inactivation.
5. **Organic Biocides:** Various organic compounds, such as triclosan and triclocarban, are used as biocides in coatings. They exhibit antimicrobial properties and can be effective against bacteria and some fungi.

It is important to note that the choice of biocide depends on the specific coating application and the target microorganisms. The effectiveness and regulatory compliance of biocides are crucial considerations in their selection for coating formulations.

*Q9. How to adjust the Safe and Sustainable by Design approach for biocidal coatings? Limit to 200 words.*

The Safe and Sustainable by Design approach can be adjusted for biocidal coatings to ensure the development and use of coatings that are both effective in controlling microbial growth and environmentally friendly. Here are some key considerations:

1. **Hazard assessment:** Conduct a thorough assessment of the potential hazards associated with the biocidal components used in the coatings. Identify any risks to human health and the environment, including potential toxicity or ecological impacts.
2. **Alternative selection:** Explore and consider alternative biocidal agents or coating technologies that are less hazardous or have a lower environmental impact. Look for biocidal agents with favorable safety profiles and environmental characteristics, such as low toxicity, biodegradability, and minimal persistence in the environment.
3. **Life cycle assessment:** Evaluate the environmental impacts of the entire life cycle of the biocidal coatings, from raw material extraction to disposal. Assess factors such as energy

consumption, emissions, and waste generation. Aim to minimize the overall environmental footprint.

4. Regulation compliance: Ensure compliance with relevant regulations and guidelines governing the use of biocidal substances. Understand and adhere to regulatory requirements, such as registration, labeling, and restrictions on certain biocides.
5. Education and communication: Promote awareness and understanding of the Safe and Sustainable by Design approach among stakeholders, including manufacturers, suppliers, applicators, and end-users. Encourage responsible use of biocidal coatings and provide information on proper handling, disposal, and potential risks.

By incorporating these considerations, the Safe and Sustainable by Design approach can guide the development and utilization of biocidal coatings that are effective, safe for human health, and environmentally responsible.

## Section S2. Different Tools

### S2.1. Microsoft Bing

*Q4. What is the difference between primary and secondary MPs? Limit to 200 words.*

Microplastics (MPs) can be classified into two categories based on their origin<sup>1</sup>. Primary MPs are tiny particles designed for commercial use, such as cosmetics, as well as microfibers shed from clothing and other textiles, such as fishing nets<sup>1</sup>. Secondary MPs are particles that result from the breakdown of larger plastic items, such as water bottles<sup>1</sup>.

I hope this helps!

Quelle: Unterhaltung mit Bing, 4/11/2023(1) Microplastics - National Geographic Society.  
<https://www.nationalgeographic.org/encyclopedia/microplastics/> Zugriffen 4/11/2023.

(2) Understanding Primary vs. Secondary Capital Markets - Investopedia.  
<https://www.investopedia.com/ask/answers/012615/whats-difference-between-primary-and-secondary-capital-markets.asp> Zugriffen 4/11/2023.

(3) Difference Between Primary and Secondary.  
<http://www.differencebetween.net/language/words-language/difference-between-primary-and-secondary/> Zugriffen 4/11/2023.

(4) Primary and secondary microplastics. The primary microplastics or ....  
[https://www.researchgate.net/figure/Primary-and-secondary-microplastics-The-primary-microplastics-or-microplastic-beads\\_fig1\\_272079358](https://www.researchgate.net/figure/Primary-and-secondary-microplastics-The-primary-microplastics-or-microplastic-beads_fig1_272079358) Zugriffen 4/11/2023.

(5) Primary-Side vs. Secondary-Side Regulation | Article | MPS.  
<https://www.monolithicpower.com/en/primary-side-vs-secondary-side-regulation> Zugriffen 4/11/2023.



Q4. (second run) What is the difference between primary and secondary MPs? Limit to 200 words.

Primary microplastics are tiny particles designed for commercial use, such as cosmetics, as well as microfibers shed from clothing and other textiles, such as fishing nets. Secondary microplastics are particles that result from the breakdown of larger plastic items, such as water bottles<sup>1</sup>. I hope this helps!

Quelle: Unterhaltung mit Bing, 4/11/2023(1) Microplastics - National Geographic Society.  
<https://www.nationalgeographic.org/encyclopedia/microplastics/> Zugegriffen 4/11/2023.

(2) Difference Between Primary and Secondary.

<http://www.differencebetween.net/language/words-language/difference-between-primary-and-secondary/> Zugegriffen 4/11/2023.

(3) Primary-Side vs. Secondary-Side Regulation | Article | MPS.

<https://www.monolithicpower.com/en/primary-side-vs-secondary-side-regulation> Zugegriffen 4/11/2023.

(4) Primary vs. Secondary Progressive MS: Differences, Symptoms, Tips.

[https://www.medicinenet.com/primary\\_vs\\_secondary\\_progressive\\_ms/article.htm](https://www.medicinenet.com/primary_vs_secondary_progressive_ms/article.htm) Zugegriffen 4/11/2023.

Q5. What is the concentration of MPs in soils? Limit to 200 words.

The concentration of MPs (microplastics) in soils varies depending on the location and the type of soil<sup>1</sup>. According to a review by Bueks and Kaupenjohann (2020), the concentrations of MPs in fields with plastic mulching were approximately 158 pieces kg<sup>-1</sup> dry soil<sup>1</sup>. Common global MP concentration amounts are up to 13,000 items kg<sup>-1</sup> of dry soil and 4.5 mg kg<sup>-1</sup> of dry soil<sup>2</sup>. The mass and particle number introduced to global soils with sewage sludge is about one order of magnitude larger than with plastic mulching<sup>2</sup>. In some regions, such as near an industrial facility in Sydney, Australia, the concentration of MPs and NPs (nanoplastics) in soils has been detected to be as high as 67,500 mg/kg<sup>3</sup>.

I hope this helps!

Quelle: Unterhaltung mit Bing, 4/11/2023(1) Global concentrations of microplastics in soils - A review.

[https://www.researchgate.net/publication/347685067\\_Global\\_concentrations\\_of\\_microplastics\\_in\\_soils\\_-\\_A\\_review](https://www.researchgate.net/publication/347685067_Global_concentrations_of_microplastics_in_soils_-_A_review) Zugegriffen 4/11/2023.

(2) SOIL - Global concentrations of microplastics in soils – a review.

<https://soil.copernicus.org/articles/6/649/2020/> Zugegriffen 4/11/2023.

(3) Abundance and Distribution of MPs and NPs in Soil: A Global ... - Springer.

[https://link.springer.com/chapter/10.1007/978-3-031-21195-9\\_3](https://link.springer.com/chapter/10.1007/978-3-031-21195-9_3) Zugegriffen 4/11/2023.

(4) Global concentrations of microplastics in soils – a review.

<https://soil.copernicus.org/articles/6/649/2020/soil-6-649-2020-discussion.html> Zugegriffen 4/11/2023.

Q5. (second run) What is the concentration of MPs in soils? Limit to 200 words.

The abundance of microplastics (MPs) in soil varies depending on the location and source of contamination<sup>1</sup>. Common global MP concentration amounts are up to **13,000 items kg<sup>-1</sup>** of dry soil and **4.5 mg kg<sup>-1</sup>** of dry soil<sup>2</sup>. The amount of MPs entering the soil through the application of agricultural sludge in North America amounts to **63,000–430,000 t per year**, and in Europe, it is about **44,000–300,000 t**<sup>1</sup>. The mass and particle number introduced to global soils with sewage sludge is about 1 order of magnitude larger than with plastic mulching<sup>2</sup>. The concentration of MPs and NPs in soils near an industrial facility has been detected to be of the amount **2400 mg/kg** on average in Sydney of Australia<sup>3</sup>.

I hope this helps!

Quelle: Unterhaltung mit Bing, 4/11/2023(1) A Review of Microplastics in Soil: Distribution Within ... - Springer. <https://link.springer.com/article/10.1007/s11270-022-05837-w> Zugriffen 4/11/2023.

(2) SOIL - Global concentrations of microplastics in soils – a review. <https://soil.copernicus.org/articles/6/649/2020/> Zugriffen 4/11/2023.

(3) Abundance and Distribution of MPs and NPs in Soil: A Global ... - Springer. [https://link.springer.com/chapter/10.1007/978-3-031-21195-9\\_3](https://link.springer.com/chapter/10.1007/978-3-031-21195-9_3) Zugriffen 4/11/2023.

Q8. How to calculate the release of tire wear particles from a car ride? Write 200 words.

The emissions of tire wear particles (TWP) which are annually generated on the German road network were calculated in a study<sup>1</sup>. The emissions are calculated by applying two different data sets of emission factors (EFs) to the traffic volume data<sup>1</sup>. According to the calculations, total annual emissions of non-airborne (coarse) TWP generated on German roads amounts to about 98,400 t/a when the EF compiled by DELTARES and TNO, 2016 are applied<sup>3</sup>. Based on the EF derived by Gebbe et al. (1997), emissions of total TWP are about 79,200 t/a<sup>3</sup>.

I hope this helps!

Quelle: Unterhaltung mit Bing, 4/11/2023(1) Tyre and road wear particles - A calculation of generation, transport .... <https://pubmed.ncbi.nlm.nih.gov/33207487/> Zugriffen 4/11/2023.

(2) Tyre and road wear particles - A calculation of generation, transport .... <https://www.sciencedirect.com/science/article/pii/S0048969720354681> Zugriffen 4/11/2023.

(3) Tire wear particle emissions: Measurement data where are you?. <https://www.sciencedirect.com/science/article/pii/S004896972201748X> Zugriffen 4/11/2023.

Q8. (second run) How to calculate the release of tire wear particles from a car ride? Write 200 words

The emissions of tire wear particles (TWP) which are annually generated on the German road network were calculated by applying two different data sets of emission factors and the annual mileage for distinct vehicles and road types (urban roads, rural roads, highways)<sup>1</sup>. However, I am not sure if this is what you are looking for. Could you please provide more details about your question?

Quelle: Unterhaltung mit Bing, 4/11/2023(1) Tyre and road wear particles - A calculation of generation, transport .... <https://www.sciencedirect.com/science/article/pii/S0048969720354681> Zugriffen 4/11/2023.

(2) Occurrence of tire and road wear particles in urban and peri-urban .... <https://www.sciencedirect.com/science/article/pii/S0048969722008774> Zugriffen 4/11/2023.

(3) Tyre and road wear particles - A calculation of generation, transport .... <https://pubmed.ncbi.nlm.nih.gov/33207487/> Zugriffen 4/11/2023.

## S2.2. Google Bard

Q4. What is the difference between primary and secondary MPs? Limit to 200 words.

Sure. Here is the difference between primary and secondary microplastics:

Primary microplastics are plastic particles that are manufactured to be less than 5 millimeters in size. They are commonly used in a variety of products, including cosmetics, personal care products, and paints. Some examples of primary microplastics include:

- Microbeads: These are small, spherical plastic particles that are used in cosmetics and personal care products, such as facial scrubs and toothpaste.
- Nurdles: These are small, cylindrical plastic pellets that are used in the manufacturing of plastic products.
- Microfibers: These are tiny plastic fibers that are released from synthetic clothing, such as fleece and polyester.

Secondary microplastics are plastic particles that are formed from the fragmentation of larger plastic items. They can be generated from a variety of sources, including:

- The weathering of plastic debris in the environment
- The breakdown of plastic products in landfills
- The incineration of plastic waste

Some examples of secondary microplastics include:

- Fragments of plastic bottles and bags
- Shredded plastic fishing nets
- Microplastics from tire wear

Both primary and secondary microplastics can have a negative impact on the environment. They can pollute waterways, harm wildlife, and enter the food chain. More research is needed to understand the full extent of the risks posed by microplastics, but the available evidence suggests that they are a serious environmental problem.

Q4. (second run) What is the difference between primary and secondary MPs? Limit to 200 words.

Sure. Here is the difference between primary and secondary microplastics:

Primary microplastics are intentionally manufactured to be <5mm in size. They are used in a variety of products, including:

- Cosmetics
- Personal care products
- Paints
- Abrasives
- Agriculture
- Filtration
- Medical devices

Secondary microplastics are plastic particles that are formed from the fragmentation of larger plastic items. They can be generated from a variety of sources, including:

- The weathering of plastic debris in the environment
- The breakdown of plastic products in landfills
- The incineration of plastic waste

Primary microplastics are a major source of microplastic pollution. They are released into the environment from a variety of sources, and they can be transported long distances by wind and water. Primary microplastics can be ingested by wildlife, and they can also enter the food chain. Secondary microplastics are also a source of microplastic pollution. They are formed from the breakdown of larger plastic items, and they can be released into the environment from a variety of sources. Secondary microplastics can also be ingested by wildlife, and they can also enter the food chain.

Both primary and secondary microplastics can have a negative impact on the environment. They can pollute waterways, harm wildlife, and enter the food chain. More research is needed to understand the full extent of the risks posed by microplastics, but the available evidence suggests that they are a serious environmental problem.

Q5. What is the concentration of MPs in soils? Limit to 200 words.

The concentration of microplastics (MPs) in soils varies widely, depending on a number of factors, including the location, land use, and soil type. In general, however, MPs are found in soils at concentrations of a few to several thousand particles per kilogram of dry soil. Some

studies have reported even higher concentrations, up to tens of thousands of particles per kilogram.

The most common sources of MPs in soils are:

- Plastic mulching: Plastic mulch is used in agriculture to protect crops from weeds and pests. It is a major source of MPs in agricultural soils.
- Sewage sludge: Sewage sludge is a byproduct of wastewater treatment. It is often applied to agricultural land as a fertilizer. Sewage sludge can contain high levels of MPs.
- Littering: Plastic litter is a major source of MPs in urban and suburban soils.
- Atmospheric deposition: MPs can be deposited onto soils from the atmosphere. This is a relatively minor source of MPs, but it can be significant in areas with high levels of air pollution.

The presence of MPs in soils can have a number of negative impacts, including:

- Pollution of water resources: MPs can leach from soils into groundwater and surface water. This can pollute drinking water and aquatic ecosystems.
- Toxicity to soil organisms: MPs can be toxic to soil organisms, such as earthworms and bacteria. This can disrupt soil ecosystems and reduce soil fertility.
- Accumulation in food crops: MPs can be taken up by plants from soils. This means that they can end up in food crops, which can pose a risk to human health.
- More research is needed to understand the full extent of the risks posed by MPs in soils. However, the available evidence suggests that they can have a significant negative impact on the environment.

*Q5. (second run) What is the concentration of MPs in soils? Limit to 200 words.*

The concentration of microplastics (MPs) in soils varies widely, but is generally in the range of 100 to 10,000 particles per kilogram of dry soil. Some studies have reported even higher concentrations, up to 100,000 particles per kilogram. The highest concentrations of MPs are typically found in soils near urban areas and industrial sites.

The main sources of MPs in soils are:

- Plastic debris: This includes plastic bags, bottles, straws, and other items that are commonly found in the environment.
- Sewage sludge: This is a byproduct of wastewater treatment and can contain high levels of MPs.
- Agricultural runoff: This can contain MPs from fertilizers, pesticides, and other agricultural chemicals.

- Atmospheric deposition: MPs can be transported long distances through the atmosphere and deposited onto soils.

The presence of MPs in soils can have a number of negative impacts, including:

- Pollution of water resources: MPs can leach from soils into groundwater and surface water. This can pollute drinking water and aquatic ecosystems.
- Toxicity to soil organisms: MPs can be toxic to soil organisms, such as earthworms and bacteria. This can disrupt soil ecosystems and reduce soil fertility.
- Accumulation in food crops: MPs can be taken up by plants from soils. This means that they can end up in food crops, which can pose a risk to human health.

More research is needed to understand the full extent of the risks posed by MPs in soils. However, the available evidence suggests that they can have a significant negative impact on the environment.

*Q8. How to calculate the release of tire wear particles from a car ride? Write 200 words.*

The release of tire wear particles from a car ride can be calculated using the following equation:

Code snippet

$$P = (W * V * f) / 1000$$

Use code with caution. [Learn more](#)

content\_copy

Where:

- P = the mass of tire wear particles released (in grams)
- W = the weight of the car (in kilograms)
- V = the speed of the car (in kilometers per hour)
- f = the friction coefficient between the tire and the road (a value of 0.8 is typically used)

For example, a car that weighs 1,500 kilograms traveling at 100 kilometers per hour would release approximately 1.2 grams of tire wear particles per kilometer.

It is important to note that this is just a simplified equation, and the actual amount of tire wear particles released will vary depending on a number of factors, including the type of tire, the road surface, and the weather conditions.

The release of tire wear particles is a major source of microplastic pollution. These particles can be harmful to the environment and to human health. There are a number of things that can be done to reduce the release of tire wear particles, including:

- Driving at a slower speed
- Using tires with a lower rolling resistance
- Avoiding driving on rough roads
- Keeping your tires properly inflated

By taking these steps, you can help to reduce the amount of tire wear particles that are released into the environment.

*Q8. (second run) How to calculate the release of tire wear particles from a car ride? Write 200 words.*

Sure. Here is how to calculate the release of tire wear particles from a car ride:

1. Find the weight of your car. This information can be found in your car's owner's manual.
2. Find the speed of your car. This information can be found on your car's speedometer.
3. Find the friction coefficient between your tires and the road. This information can be found in a variety of sources, including online databases and engineering textbooks.
4. Plug the values you found in the following equation:

Code snippet

$$P = (W * V * f) / 1000$$

Use code with caution. Learn more

content\_copy

Where:

- P is the mass of tire wear particles released (in grams)
- W is the weight of the car (in kilograms)
- V is the speed of the car (in kilometers per hour)
- f is the friction coefficient between the tire and the road (a value of 0.8 is typically used)

For example, a car that weighs 1,500 kilograms traveling at 100 kilometers per hour would release approximately 1.2 grams of tire wear particles per kilometer.

It is important to note that this is just a simplified equation, and the actual amount of tire wear particles released will vary depending on a number of factors, including the type of tire, the road surface, and the weather conditions.

The release of tire wear particles is a major source of microplastic pollution. These particles can be harmful to the environment and to human health. There are a number of things that can be done to reduce the release of tire wear particles, including:

- Driving at a slower speed
- Using tires with a lower rolling resistance
- Avoiding driving on rough roads
- Keeping your tires properly inflated

By taking these steps, you can help to reduce the amount of tire wear particles that are released into the environment.

### **S2.3. ChatGPT (second run answers for comparison)**

*Q4. What is the difference between primary and secondary MPs? Limit to 200 words.*

Primary and secondary microplastics are two distinct categories of microscopic plastic particles that have different origins and characteristics.

Primary microplastics are intentionally manufactured or designed to be small in size, typically measuring less than 5mm. They include items like microbeads used in personal care products, pellets or nurdles used as raw materials in plastic production, and fibers released from textiles during washing. These particles are directly released into the environment in their micro-sized form.

On the other hand, secondary microplastics are the result of the degradation and fragmentation of larger plastic items. Over time, larger plastic objects exposed to environmental factors, such as sunlight, wind, and wave action, break down into smaller and smaller particles. This process eventually leads to the formation of secondary microplastics. For example, a plastic bottle gradually degrades in the environment and transforms into smaller plastic fragments, which can become microplastics.

Primary microplastics are typically introduced into the environment in their micro-sized form, while secondary microplastics are created through the breakdown of larger plastic objects. Both types of microplastics pose environmental concerns as they can accumulate in various ecosystems, be ingested by marine life, and potentially enter the food chain.

Understanding the distinction between primary and secondary microplastics is important for developing targeted mitigation strategies. By addressing the sources of primary microplastics, such as banning microbeads or improving plastic waste management, the amount of these particles released into the environment can be reduced. Efforts to prevent plastic pollution and promote recycling also play a role in minimizing the generation of secondary microplastics.

*Q5. Can be seen in Section S3.1.*

*Q8. How to calculate the release of tire wear particles from a car ride? Limit to 200 words.*

Calculating the precise release of tire wear particles from a car ride can be challenging due to various factors involved. However, a rough estimation can be made based on certain



assumptions and available data. Here's a simplified approach to estimating the release of tire wear particles:

1. Determine the tire wear rate: The wear rate of tires can vary depending on factors like tire composition, tread depth, road surface, driving style, and distance traveled. Research studies and tire manufacturers' data can provide approximate wear rates for different types of tires.
2. Estimate tire weight loss: Based on the wear rate, estimate the weight loss of the tires during the car ride. Multiply the wear rate by the distance traveled to get an approximation of the weight loss in grams.
3. Convert weight loss to particle release: Convert the weight loss to the number of tire wear particles released. This conversion can be challenging as it requires assumptions about the size distribution of wear particles. Research studies suggest that wear particles can range from nanometers to micrometers in size. By assuming an average particle size, you can estimate the number of particles released based on the weight loss.
4. Consider environmental factors: It's important to note that environmental conditions such as road surface, temperature, humidity, and vehicle speed can influence the release of tire wear particles. These factors may require additional adjustments or considerations in the estimation process.

It's worth mentioning that this approach provides a rough estimation and is subject to various uncertainties. Accurate measurement of tire wear particle release requires sophisticated equipment and controlled experimental setups.

*Q4. (second run) What is the difference between primary and secondary MPs? Limit to 200 words.*

Primary and secondary MPs, also known as Members of Parliament, refer to different roles and responsibilities within a parliamentary system. The distinction lies in their level of engagement and influence in the legislative process.

Primary MPs, often referred to as "frontbenchers," hold significant positions within the governing party or coalition. They typically serve as cabinet ministers or hold important leadership roles. Primary MPs have a direct impact on policy-making and decision-making processes. They are responsible for proposing and drafting legislation, shaping government policies, and representing their party's interests in parliamentary debates. Their role is crucial in steering the direction of the government and enacting legislative changes.

Secondary MPs, commonly known as "backbenchers," are members of parliament who do not hold ministerial positions or occupy prominent leadership roles within their party. They generally represent the interests of their constituents and provide oversight to the government. While they have the opportunity to participate in parliamentary debates and contribute to the legislative process, their influence on policymaking and decision-making is relatively limited compared to primary MPs.

Backbenchers often play a crucial role in holding the government accountable by scrutinizing its actions, questioning ministers, and proposing amendments to legislation. They serve as a bridge between their constituents and the government, advocating for local issues and concerns. However, their ability to shape the direction of government policies is more indirect, as they rely on influencing their party's leadership or joining cross-party alliances to enact change.

In summary, primary MPs are influential figures within the government, directly involved in policy-making and decision-making, while secondary MPs have a more limited role in shaping legislation and focus on representing their constituents and providing oversight to the government.

## Section S3. Language

### S3.1. English – Second run answers

*Q5. What is the concentration of MPs in soils? Limit to 200 words.*

The concentration of microplastics (MPs) in soils varies widely depending on a variety of factors, including location, land use, and management practices. MPs in soils can come from a variety of sources, such as agricultural films, synthetic textiles, and plastic mulch, as well as atmospheric deposition and runoff from nearby sources.

Studies have shown that concentrations of MPs in agricultural soils can range from a few hundred particles per kilogram to several thousand particles per kilogram. In urban and industrial areas, concentrations can be even higher. The size and type of MPs also vary, with some studies reporting an abundance of fibers and fragments, while others report higher levels of microbeads and pellets.

The impact of MPs in soils is not yet fully understood, but research suggests that they may have negative effects on soil health and the organisms living within it. For example, MPs have been shown to alter soil microbial communities, reduce earthworm populations, and affect plant growth and development.

Overall, the concentration of MPs in soils is a growing concern, as it has the potential to impact not only soil health but also food safety and human health. More research is needed to better understand the sources, fate, and effects of MPs in soils, as well as develop strategies to mitigate their accumulation and potential impacts.

*Q6. What does a tire particle consist of? Limit to 200 words.*

A tire particle, also known as a tire-wear particle, is a small piece of rubber that is released from the surface of a tire as it wears down over time. Tire particles can vary in size, shape, and composition depending on the type of tire, the road surface, and other factors.

Tire particles are typically composed of a mixture of natural and synthetic rubber, as well as other substances such as carbon black, oil, and various chemicals used in the manufacturing process. These particles can range in size from a few microns to several millimeters and can be released into the environment through several pathways, including runoff from roads, direct deposition from the atmosphere, and the use of compost or other organic materials that contain tire particles.

Studies have shown that tire particles can pose a risk to human health and the environment by introducing microplastics and other potentially harmful substances into the ecosystem. In addition to rubber, tire particles can also contain other substances such as heavy metals,

polycyclic aromatic hydrocarbons (PAHs), and other chemicals that can accumulate in the environment and pose risks to human health and the environment.

Overall, tire particles are a complex mixture of substances that can vary depending on the type of tire and the conditions under which they are released into the environment. Further research is needed to better understand the composition and potential impacts of tire particles on human health and the environment.

*Q9. Tell me the risk of tire-wear particles on agricultural soils? Limit to 200 words.*

Tire-wear particles are a potential source of microplastics (MPs) in agricultural soils, and their presence can pose several risks to soil health and agricultural productivity. When tires wear down, they release tiny particles containing a mixture of rubber, chemicals, and metals. These particles can be transported by wind and water, and deposited on nearby agricultural fields.

Studies have shown that tire-wear particles in soils can accumulate and persist for many years, potentially leading to soil contamination and decreased soil fertility. The particles can also alter the soil microbial community, leading to changes in nutrient cycling and affecting the health of soil organisms. In addition, tire-wear particles can contain toxic metals such as lead and zinc, which can accumulate in soils and pose a risk to human health and the environment.

The risk of tire-wear particles on agricultural soils depends on factors such as proximity to roads and traffic volume, as well as the frequency of tillage and other management practices. Agricultural activities such as plowing and fertilization can also increase the likelihood of soil erosion and the accumulation of tire-wear particles.

Overall, it is important to manage tire-wear particles and other sources of microplastics to prevent their accumulation in agricultural soils. This can include measures such as reducing traffic volume near fields, using tire-wear-resistant road surfaces, and incorporating soil conservation practices such as cover cropping and reduced tillage.

### **S3.2. Korean**

**Q5. 토양의 마이크로 플라스틱 농도가 얼마야?**

토양 내 마이크로 플라스틱(Microplastics, MPs) 농도는 해당 지역의 플라스틱 오염 정도, 토양의 특성, 샘플링 및 분석 방법 등 다양한 요인에 따라 차이가 있습니다. 그러나 연구에 따르면, 마이크로 플라스틱은 외딴 지역에서부터 도시 환경까지 다양한 지역의 토양에서 발견될 수 있습니다.

토양 내 마이크로 플라스틱의 농도는 일반적으로 토양의 무게 또는 체적 당 입자 수로 측정됩니다. 연구에 따르면, 샘플링 방법과 지역에 따라 킬로그램당 입자 수가 1개 미만에서 수만 개까지 범위가 있습니다.

하지만 정확한 마이크로 플라스틱 농도는 아직 확립되지 않은 분야입니다. 이에 따라 마이크로 플라스틱의 측정 방법 및 기준화가 여전히 연구 중이며, 현재까지의 연구 결과를 종합하면, 토양 내

마이크로 플라스틱은 토양 건강에 대한 우려와 함께, 작물이나 토양에 서식하는 생물체가 마이크로 플라스틱을 섭취하여 식물, 동물 등 식량 연쇄에 영향을 미칠 가능성도 제기되고 있습니다.

**Q5. (second run): 토양의 마이크로 플라스틱 농도가 얼마야?**

토양 내 마이크로 플라스틱 농도는 지역과 샘플링 방법에 따라 다양합니다. 연구에 따르면, 국내외에서 수집된 토양 샘플에서 마이크로 플라스틱 입자가 감지되는 비율은 70% 이상으로 나타나고 있습니다.

한국에서의 연구 결과를 보면, 국내 주요 도시 및 해안 지역의 토양 샘플에서 1kg당 평균 200~300개의 마이크로 플라스틱 입자가 감지되었습니다. 농경지와 같은 특정 지역에서는 이보다 높은 농도가 나타나기도 합니다.

전 세계적으로, 마이크로 플라스틱이 포함된 오염된 배출물이 많은 지역에서 더 높은 농도의 마이크로 플라스틱이 검출되고 있습니다. 그러나 일부 연구에서는 외딴 지역에서도 낮은 농도의 마이크로 플라스틱이 감지되었기 때문에, 마이크로 플라스틱이 환경 전반에 걸쳐 보급되어 있다는 것을 시사하고 있습니다.

마이크로 플라스틱이 토양 내에 존재할 경우, 그것이 식물, 동물 등을 통해 식량 연쇄에 영향을 미칠 가능성이 있으며, 이로 인해 인체 건강에도 영향을 미칠 수 있습니다. 따라서 토양 내 마이크로 플라스틱 농도를 파악하고 관리하는 것이 중요합니다.

**Q6. 타이어 입자 구성은 뭐야?**

타이어 입자는 시간이 지남에 따라 마모되면서 분리되는 다양한 재료로 구성될 수 있습니다. 이러한 재료에는 고무, 카본 블랙, 다양한 화학물질 및 첨가제, 때로는 스틸벨트 라디얼 타이어에서 나오는 금속 와이어 등이 포함될 수 있습니다.

타이어의 고무는 분자들이 서로 연결된 긴 체인인 고분자로 만들어집니다. 카본 블랙은 종종 고무에 첨가되어 강도와 내구성을 향상시키기도 합니다. 타이어의 특정 속성, 예를 들어 내열성이나 내한성을 향상시키거나 마찰력을 향상시키기 위해 다양한 화학물질 및 첨가제를 포함할 수도 있습니다.

타이어가 마모되면 이러한 재료는 작은 입자 형태로 분리될 수 있으며, 공기 중에 부유하여 대기 오염에 기여할 수 있습니다. 또한 마모된 타이어 입자는 도로 위에 축적되어 물로 씻겨 수로 및 기타 물체에 영향을 미치며, 수생 생물에 부정적인 영향을 미칠 수 있습니다.

**Q6. (second run): 타이어 입자 구성은 뭐야?**

1. 고무: 타이어의 고무는 타이어를 만들기 위해 사용되는 고분자로 만들어집니다. 이러한 고분자는 다양한 타이어 유형에 따라 다르며, 일반적으로 합성 고무 또는 천연 고무로 만들어집니다.
2. 카본 블랙: 카본 블랙은 고무에 첨가되어 강도와 내구성을 향상시키는 데 사용되는 검은색 분말입니다. 이는 타이어가 마모되면서 일부가 분리되어 입자를 형성하는 데 기여합니다.
3. 화학 물질 및 첨가제: 타이어는 내열성, 내한성, 마찰력, 내마모성 및 기타 다양한 특성을 부여하기 위해 다양한 화학 물질 및 첨가제가 포함됩니다. 예를 들어, 실리카나 유기산은 내마모성을 향상시키는 데 사용됩니다.
4. 스틸벨트 라디얼 타이어에서 나오는 금속 와이어: 스틸벨트 라디얼 타이어에는 고강도 스틸 선으로 만들어진 벨트가 포함됩니다. 이러한 와이어는 마모되면서 분리되어 입자를 형성하는 데 기여합니다.

이러한 재료들은 마모되면 작은 입자 형태로 분리되어 대기 중에 부유하거나 도로 위에서 축적될 수 있습니다. 이러한 입자는 환경 오염의 주요 원인 중 하나이며, 건강에도 해로울 수 있으므로 관리와 처리가 필요합니다.

**Q9. 타이어 마모입자가 농업용 토양에 미치는 위해성에 대해 말해줘**

타이어 마모입자는 마이크로플라스틱을 함유하고 있기 때문에 농업용 토양에 여러 가지 위해성을 미칠 수 있습니다. 이러한 입자는 토양 내에서 축적될 수 있고 오랜 시간동안 지속될 수 있기 때문에, 환경에 마이크로플라스틱이 축적되는 것을 초래할 수 있습니다. 따라서 마이크로플라스틱이 함유된 오염된 토양에서 재배되는 작물은 이들 마이크로플라스틱을 흡수할 가능성이 있으며, 결국은 식품 사슬을 통해 인체 건강에 위협이 될 수 있습니다.

또한 타이어 마모입자는 토양의 물리화학적 특성을 변화시킬 수 있기 때문에 토양의 비옥도, 수분 보유력, 영양소 이용 가능성 등이 저하될 수 있습니다. 이로 인해 시간이 지남에 따라 작물 수확량이 감소하고 농업 생산성이 줄어들 수 있습니다.

또한 농업용 토양 내에 마이크로플라스틱이 존재하면, 토양 내 생물인 균류, 곰팡이, 기타 미생물 등에게 영향을 미치게 되며, 이들 생물은 토양 건강과 비옥도를 유지하는 데 중요한 역할을 합니다. 마이크로플라스틱은 또한 지렁이 및 기타 토양 저어류 동물에게 영향을 미칠 수 있으며, 이는 토양 구조와 영양소 순환에 중요한 영향을 미칩니다.

따라서 타이어 마모입자가 농업용 토양 내에 축적되는 것은 중요한 생태학적 및 경제학적 영향을 미칠 수 있으며, 그들의 환경 내 방출을 관리하고 최소화하는 것이 중요합니다.

**Q9.(second run) 타이어 마모입자가 농업용 토양에 미치는 위해성에 대해 말해줘**

타이어 마모입자가 농업용 토양에 미치는 위해성은 아직까지 완전히 밝혀지지지는 않았지만, 몇 가지 위험요소가 있습니다.

첫째, 마모입자가 포함된 토양은 수분 흡수와 배수가 제한되며, 그 결과 농작물의 성장과 생산성이 저하될 수 있습니다.

둘째, 마모입자는 농작물의 뿌리와 식물 조직 내에 침투할 수 있으며, 이로 인해 식물의 성장이 제한될 수 있습니다.

셋째, 마모입자가 포함된 토양에서는 유기물 분해와 같은 생태계 프로세스가 저해될 수 있으며, 이는 생태계 전반에 영향을 미칩니다.

넷째, 마모입자에 함유된 유해한 화학물질이 농작물에 흡수될 가능성도 있습니다.

이러한 위험은 아직까지 연구가 진행 중이며, 더 많은 연구가 필요합니다. 그러나 이러한 위험성을 최소화하기 위해 타이어의 내구성을 향상시키고, 타이어 마모를 줄이는 기술 개발 등의 노력이 필요합니다.

### S3.3. Chinese

Q5. 土壤中的微塑料浓度是多少？请在200字以内回答。

土壤中的微塑料浓度因地域、环境、人类活动等因素而异。目前全球范围内的研究表明，土壤中的微塑料浓度普遍存在且不容忽视。根据相关文献报道，欧洲地区土壤中微塑料的平均浓度为300个/kg，而北美地区则为440个/kg。在中国，研究显示城市公园和自然保护区的土壤中微塑料的平均浓度分别为38个/kg和20个/kg。另外，一些研究表明，在工业、垃圾填埋场等污染源周围的土壤中，微塑料的浓度可能会更高。虽然目前对于微塑料在土壤中的影响还需进一步深入研究，但高浓度的微塑料对于土壤生态系统和农作物的生长发育可能存在潜在的威胁。

Q5.(second run) 土壤中的微塑料浓度是多少？请在200字以内回答。

土壤中微塑料的浓度因地区、土壤类型、环境因素等而异，研究结果也有所不同。但总体来说，微塑料在土壤中的存在已经成为全球性的环境问题。

根据现有研究，土壤中微塑料的浓度通常在每千克土壤中数十至数百个微塑料颗粒之间。具体数值还受到样本采集、处理、检测等因素的影响，因此不能一概而论。

此外，微塑料的种类也各不相同，有些可能较易被土壤吸附而聚集在表层土壤中，有些则可能会随着水分向深层土壤迁移。因此，在研究微塑料在土壤中的浓度时，需要考虑多种因素的影响。

Q6. 轮胎颗粒由什么构成？请在200字以内回答。

轮胎颗粒是一种常见的微塑料污染源，由废旧轮胎经过物理或化学加工后制成。轮胎颗粒主要由以下成分构成：

1. 橡胶：轮胎颗粒的主要成分是橡胶，包括天然橡胶和合成橡胶。
2. 塑料：除了橡胶外，轮胎颗粒还包含一些塑料成分，主要是聚丙烯、聚氨酯等。
3. 炭黑：为了提高轮胎的耐磨性和抗老化性能，轮胎中还加入了一定比例的炭黑。
4. 金属：废旧轮胎中还含有一定量的金属，如钢丝、铝合金等。
5. 其他添加剂：轮胎颗粒中还可能包含一些其他的添加剂，如防腐剂、稳定剂等。

以上这些成分在废旧轮胎经过加工后，会被分离和筛选，形成不同尺寸和形状的轮胎颗粒，用于运动场地、人工草坪、道路建设等领域。

Q6. (second run) 轮胎颗粒由什么构成？请在200字以内回答。

轮胎颗粒是一种常见的微塑料来源，它由轮胎磨损后产生的小颗粒组成。这些颗粒通常由橡胶、填充剂、添加剂和其他化学物质组成。

其中，橡胶是轮胎颗粒的主要成分，通常是通过加工废旧轮胎得到的再生橡胶，或是天然橡胶。填充剂通常用于增加轮胎的硬度和耐磨性，常见的有炭黑、硅石粉等。添加剂则用于改善轮胎的性能和工艺特性，如加速剂、抗氧化剂等。

此外，轮胎颗粒中还可能含有其他化学物质，如苯、酚、聚芳香烃等，这些物质可能对环境与健康造成潜在危害。因此，对轮胎颗粒的组成和特性进行深入研究，对于解决微塑料污染问题具有重要意义。

Q9. 轮胎磨损颗粒对农业土壤造成了怎样的风险？请在200字以内回答。

轮胎磨损颗粒是一种常见的微塑料污染源，它含有一定量的有害物质，对农业土壤可能会造成潜在的风险，主要表现为以下几个方面：

1. 污染土壤：轮胎磨损颗粒中含有聚氨酯、聚丙烯等塑料成分和炭黑等有害物质，可能会对土壤造成污染，影响土壤生态系统的健康。
2. 影响土壤质地：轮胎磨损颗粒在土壤中堆积，会改变土壤质地和通透性，影响土壤的渗透性和透气性，从而影响农作物的生长发育。
3. 损害植物生长：轮胎磨损颗粒中的有害物质可能会对植物造成损害，影响植物的生长和发育，从而降低农作物的产量和品质。
4. 传递到食物链：轮胎磨损颗粒中的微塑料和有害物质可能会通过土壤进入农作物，进而传递到食物链中，对人体健康造成潜在威胁。

因此，需要采取有效的措施减少轮胎磨损颗粒的产生和排放，并加强土壤污染监测和治理，保障农业生产的可持续发展。

Q9. (second run) 轮胎磨损颗粒对农业土壤造成了怎样的风险？请在200字以内回答。

轮胎磨损颗粒是一种常见的微塑料来源，它可能会对农业土壤造成多种风险。



首先，轮胎颗粒可能会影响土壤结构和通气性，进而影响作物的生长。大量的轮胎颗粒堆积在土壤表面可能会堵塞土孔，降低土壤透气性，导致土壤缺氧或难以排水，影响作物的根系生长和吸收营养。

其次，轮胎颗粒中含有多种化学物质，如苯、酚、聚芳香烃等，这些物质可能会对土壤微生物和作物造成潜在危害，影响土壤生态系统的稳定性和健康性。

此外，轮胎颗粒中的微塑料颗粒也可能会进入作物体内，从而进入人类食物链，对人类健康产生潜在危害。

因此，要采取有效措施减少轮胎颗粒对农业土壤造成的风险，如限制轮胎的使用寿命、改进轮胎制造材料、加强污染物排放管理等。

### S3.4. German

*Q5. Was ist die Konzentration von Mikroplastik im Boden? Limit 200 Wörter*

Die Konzentration von Mikroplastik im Boden variiert stark und hängt von verschiedenen Faktoren ab, wie z.B. der Art des Bodens, der Landnutzung und der Art der eingesetzten Kunststoffe. Es gibt derzeit keine einheitlichen Messmethoden oder Grenzwerte für die Konzentration von Mikroplastik im Boden.

Studien haben gezeigt, dass Mikroplastik im Boden in Konzentrationen von einigen hundert bis zu mehreren tausend Partikeln pro Kilogramm Boden vorkommen kann. Die höchsten Konzentrationen wurden in städtischen Gebieten, landwirtschaftlich genutzten Gebieten und in der Nähe von Abfalldeponien gemessen.

Es wird angenommen, dass Mikroplastik im Boden ökologische Auswirkungen haben kann, wie z.B. die Veränderung der Bodenstruktur und der Mikroorganismenpopulation, die Beeinträchtigung des Pflanzenwachstums und die Kontamination der Nahrungskette. Allerdings ist noch viel Forschung erforderlich, um die Auswirkungen von Mikroplastik im Boden vollständig zu verstehen und um geeignete Maßnahmen zur Reduzierung der Mikroplastikbelastung zu entwickeln.

*Q5. (second run) Was ist die Konzentration von Mikroplastik im Boden? Limit 200 Wörter*

Die Konzentration von Mikroplastik im Boden variiert je nach Standort und verschiedenen Einflussfaktoren. Es gibt keine einheitliche Konzentration, da die Messungen in verschiedenen Studien unterschiedlich ausfallen können. Allgemein lässt sich jedoch feststellen, dass Mikroplastik weltweit im Boden nachgewiesen wurde, auch in landwirtschaftlich genutzten Böden.

Studien haben gezeigt, dass die Konzentration von Mikroplastik im Boden von weniger als einem Mikrogramm pro Kilogramm ( $\mu\text{g/kg}$ ) bis zu mehreren Hundert  $\mu\text{g/kg}$  reichen kann. In einigen Fällen wurden sogar höhere Konzentrationen von mehreren Tausend  $\mu\text{g/kg}$  gefunden, insbesondere in Böden, die intensiv genutzten Gebieten oder urbanen Bereichen nahe liegen.

Die Konzentration von Mikroplastik im Boden hängt von verschiedenen Faktoren ab, wie beispielsweise der Art der landwirtschaftlichen Tätigkeiten, der Nähe zu städtischen Gebieten,



der Verwendung von Klärschlamm oder Kompost, dem Einsatz von Kunststofffolien und -mulchen sowie der Abfallentsorgung.

Es ist wichtig anzumerken, dass Mikroplastik im Boden oft nicht gleichmäßig verteilt ist und sich in verschiedenen Bodenschichten unterschiedlich anreichern kann. Die genaue Verteilung und Konzentration von Mikroplastik im Boden wird weiterhin intensiv erforscht, um ein besseres Verständnis für die Auswirkungen auf Ökosysteme und die menschliche Gesundheit zu erlangen.

Um die Belastung mit Mikroplastik im Boden zu reduzieren, ist es wichtig, den Eintrag von Plastikabfällen in die Umwelt zu minimieren und nachhaltige Abfallentsorgungs- und Recyclingpraktiken zu fördern.

*Q6. Woraus besteht Reifenabrieb? Limit 200 Wörter*

Reifenabrieb besteht aus einer Vielzahl von Partikeln, die beim Kontakt des Reifens mit der Fahrbahn freigesetzt werden. Die genaue Zusammensetzung des Abriebs hängt von verschiedenen Faktoren ab, wie z.B. dem Zustand des Reifens, der Art der Fahrbahnoberfläche, der Fahrweise und der Umgebungstemperatur. Im Allgemeinen besteht Reifenabrieb aus einer Mischung von Gummi, Metallen (z.B. Eisen, Kupfer, Zink), Ruß, Öl und anderen organischen und anorganischen Verbindungen. Diese Partikel können in die Luft und in den Boden gelangen und können Umweltprobleme verursachen. Darüber hinaus kann der Einatmen von Reifenabriebpartikeln auch negative Auswirkungen auf die Gesundheit haben, da bestimmte Verbindungen im Reifenabrieb wie polycyclische aromatische Kohlenwasserstoffe (PAK) und Feinstaubpartikel zu Atemwegsproblemen, Herzerkrankungen und Krebs führen können.

*Q6. (second run) Woraus besteht Reifenabrieb? Limit 200 Wörter*

Reifenabrieb besteht aus einer Vielzahl von Materialien, die in den Reifen verwendet werden. Die Hauptbestandteile von Reifen sind Gummi, synthetische Polymere und verschiedene Zusatzstoffe. Beim Abrieb der Reifen werden diese Materialien in Form von Partikeln freigesetzt.

Der größte Anteil des Reifenabriebs besteht aus Gummi. Dieser Gummi enthält verschiedene Arten von synthetischen und natürlichen Kautschuken, die dem Reifen Festigkeit, Flexibilität und Griffigkeit verleihen. Beim Abrieb lösen sich kleine Gummipartikel von der Reifenoberfläche ab.

Zusätzlich zum Gummi enthalten Reifen auch eine Vielzahl von synthetischen Polymeren. Diese Polymere werden zur Verbesserung der Reifenleistung verwendet und können Materialien wie Styrene-Butadiene Rubber (SBR) oder Polybutadiene umfassen. Beim Abrieb werden auch diese Polymere als Partikel freigesetzt.

Darüber hinaus enthalten Reifen verschiedene Zusatzstoffe, die ihre Eigenschaften verbessern. Dazu gehören Stabilisatoren, Weichmacher, Füllstoffe und Verstärkungsmittel. Diese Zusatzstoffe können verschiedene chemische Verbindungen enthalten, darunter Schwermetalle, Antioxidantien oder Beschleuniger. Beim Abrieb werden auch diese Substanzen in Form von Partikeln freigesetzt.

Es ist wichtig zu beachten, dass die genaue Zusammensetzung des Reifenabriebs von verschiedenen Faktoren abhängt, wie beispielsweise dem Reifentyp, dem Zustand des Reifens

und den Fahrbedingungen. Darüber hinaus können externe Einflüsse wie Straßenbeläge oder Umweltbedingungen die Zusammensetzung des Reifenabriebs beeinflussen.

*Q9. Sag mir, was das Risiko von Reifenabrieb auf landwirtschaftlich genutzten Böden ist? Limit 200 Wörter*

Reifenabrieb auf landwirtschaftlich genutzten Böden kann ein Risiko für die Bodenqualität und Pflanzengesundheit darstellen. Die Partikel im Reifenabrieb können sich im Boden ansammeln und die Bodenstruktur beeinträchtigen, indem sie die Porengröße verringern und die Bodendurchlässigkeit reduzieren. Dadurch kann der Wasser- und Nährstoffhaushalt im Boden gestört werden, was das Pflanzenwachstum und die Erträge beeinträchtigen kann.

Darüber hinaus kann der Eintrag von Reifenabrieb in landwirtschaftlich genutzte Böden auch zu einer erhöhten Kontamination mit Schwermetallen und anderen toxischen Verbindungen führen, die in den Reifen enthalten sind. Dies kann langfristige Auswirkungen auf die Bodenqualität und die Nahrungsmittelkette haben.

Es gibt auch Bedenken hinsichtlich der Auswirkungen von Mikroplastik im Reifenabrieb auf landwirtschaftlich genutzten Böden. Mikroplastik kann im Boden verbleiben und in Pflanzen aufgenommen werden, was möglicherweise negative Auswirkungen auf die Gesundheit von Mensch und Tier haben kann, die diese Pflanzen essen.

Um das Risiko von Reifenabrieb auf landwirtschaftlich genutzten Böden zu reduzieren, sollten Maßnahmen ergriffen werden, um den Eintrag von Reifenabrieb in den Boden zu minimieren. Dazu gehören beispielsweise die Verwendung von Reifen mit geringem Abrieb und die Verbesserung der Fahrbahnoberflächen, um den Reifenabrieb zu reduzieren.

*Q9 (second run). Sag mir, was das Risiko von Reifenabrieb auf landwirtschaftlich genutzten Böden ist? Limit 200 Wörter*

Reifenabrieb auf landwirtschaftlich genutzten Böden kann verschiedene Risiken mit sich bringen. Reifenabrieb besteht aus Partikeln, die von den Reifen abgerieben werden und in die Umwelt gelangen. Diese Partikel enthalten häufig Schadstoffe wie Schwermetalle, polyzyklische aromatische Kohlenwasserstoffe (PAK) und andere chemische Verbindungen. Wenn diese Substanzen in den Boden gelangen, können sie das Bodenleben beeinträchtigen und die Bodenqualität verschlechtern.

Eine direkte Auswirkung des Reifenabriebs auf landwirtschaftlich genutzte Böden ist die Verschmutzung des Bodens mit Schadstoffen. Schwermetalle können sich im Boden anreichern und langfristig die Pflanzengesundheit beeinträchtigen. Darüber hinaus können PAK und andere chemische Verbindungen toxisch für Bodenorganismen sein und das Bodenleben stören, das für die Nährstoffkreisläufe und die Bodenfruchtbarkeit wichtig ist.

Ein weiteres Risiko besteht darin, dass der Reifenabrieb den Boden physisch verändert. Die Partikel können die Bodenstruktur beeinflussen, indem sie die Porengröße verringern und die Wasserdurchlässigkeit reduzieren. Dies kann zu Bodenverdichtung und Drainageproblemen führen, was wiederum das Pflanzenwachstum beeinträchtigen kann.

Um das Risiko von Reifenabrieb auf landwirtschaftlich genutzten Böden zu reduzieren, sollten Maßnahmen ergriffen werden, um den Eintrag von Schadstoffen zu minimieren. Dazu gehören

beispielsweise die Verwendung von Reifen mit geringem Rollwiderstand und gutem Nassgriff, um den Abrieb zu reduzieren, sowie die Implementierung von effektiven Auffangsystemen an Straßen und Parkplätzen, um den Abrieb einzufangen, bevor er in die Umwelt gelangt. Eine regelmäßige Bodenanalyse kann ebenfalls helfen, eine mögliche Bodenverschmutzung frühzeitig zu erkennen und geeignete Gegenmaßnahmen zu ergreifen.

### S3.5. Spanish

*Q5. ¿Cuál es la concentración de microplásticos en suelos? Limita a 200 palabras.*

Los microplásticos son pequeñas partículas de plástico, menores a 5 mm de diámetro, que se han encontrado en diferentes medios ambientales, incluyendo los suelos. La concentración de microplásticos en los suelos puede variar dependiendo de diferentes factores, como la ubicación geográfica, las actividades humanas, la intensidad de tráfico vehicular, la cantidad de lluvia, entre otros.

Según algunos estudios recientes, la concentración de microplásticos en suelos puede ser significativa, con valores que oscilan entre 2 y 6 mil partículas por kilogramo de suelo seco. Además, se ha observado que los microplásticos tienden a concentrarse en las capas superficiales de los suelos, donde pueden interactuar con los organismos del suelo y tener efectos negativos en la biodiversidad y la salud de los ecosistemas.

Se sabe que los microplásticos en el suelo pueden provenir de diversas fuentes, como la fragmentación de residuos plásticos, la degradación de productos textiles, la liberación de partículas durante la fabricación y el uso de productos plásticos, entre otras. También se ha demostrado que los microplásticos en el suelo pueden ser transportados por el agua y el viento desde otros ambientes, como el agua dulce y los océanos.

Aunque aún existe mucha incertidumbre en torno a los efectos de los microplásticos en el suelo, se han observado algunos efectos negativos en la microbiología y la fertilidad del suelo. Además, los microplásticos pueden interactuar con otros contaminantes químicos en el suelo, lo que puede aumentar su toxicidad y potencialmente afectar la salud humana y animal. Por lo tanto, es importante continuar investigando sobre la concentración de microplásticos en los suelos y su impacto en el medio ambiente y la salud humana.

*Q5. (second run) ¿Cuál es la concentración de microplásticos en suelos? Limita a 200 palabras.*

Los microplásticos son partículas de plástico de menos de 5 mm de diámetro que pueden ser ingeridas por la vida silvestre y, en última instancia, por los seres humanos a través de la cadena alimentaria. Se ha demostrado que los microplásticos están presentes en el medio ambiente, incluyendo el suelo, el agua dulce, los océanos y el aire.

Aunque la investigación sobre la concentración de microplásticos en el suelo es limitada y varía según la ubicación geográfica, algunos estudios sugieren que los microplásticos están presentes en concentraciones que van desde varias decenas hasta miles de partículas por kilogramo de suelo. La fuente principal de microplásticos en el suelo se considera que es la degradación de productos plásticos más grandes, como bolsas y envases, así como la liberación de microplásticos en productos cosméticos y de cuidado personal.

Además, la concentración de microplásticos en el suelo puede verse afectada por factores como el tipo de suelo, la cobertura vegetal y el uso del suelo. Los estudios también han demostrado que los microplásticos pueden acumularse en ciertas áreas del suelo, como en las capas superiores o cerca de plantas y raíces.

Si bien los efectos a largo plazo de la presencia de microplásticos en el suelo aún no se comprenden completamente, se sabe que pueden afectar la calidad del suelo y la salud de la vida silvestre. Por lo tanto, se requiere una investigación adicional para comprender mejor la concentración de microplásticos en el suelo y sus impactos en el medio ambiente y la salud humana.

*Q6. ¿De qué consiste una partícula de neumático? Limita a 200 palabras.*

Una partícula de neumático es un pequeño fragmento de goma que se produce cuando se desgastan los neumáticos de vehículos, maquinaria pesada y otros equipos. Estas partículas pueden variar en tamaño desde micras hasta varios milímetros de diámetro. Se componen principalmente de caucho, que es el polímero principal del neumático, así como de otros compuestos, como aceites y productos químicos utilizados en el proceso de fabricación del neumático.

Las partículas de neumático se liberan al medio ambiente durante la conducción de vehículos y la operación de maquinaria pesada. También pueden ser liberadas en grandes cantidades durante el proceso de molienda de neumáticos usados para su reciclaje. Como resultado, las partículas de neumático pueden encontrarse en diversos entornos, como carreteras, parques, ríos y océanos.

Se ha demostrado que las partículas de neumático pueden tener efectos adversos en la salud humana y el medio ambiente. Por ejemplo, pueden ser inhaladas por las personas y los animales, lo que puede causar problemas respiratorios y otros problemas de salud. También pueden contaminar los cuerpos de agua y el suelo, lo que puede afectar la vida silvestre y los ecosistemas.

En resumen, las partículas de neumático son pequeños fragmentos de goma que se liberan al medio ambiente durante la conducción de vehículos y la operación de maquinaria pesada. Pueden contener una variedad de compuestos y pueden tener efectos adversos en la salud humana y el medio ambiente.

*Q6.(second run) ¿De qué consiste una partícula de neumático? Limita a 200 palabras.*

Una partícula de neumático, también conocida como polvo de neumático, es un material granular hecho de caucho que se produce como resultado de la trituración o molido de neumáticos de desecho. Estas partículas se utilizan en una amplia variedad de aplicaciones, como la producción de asfalto modificado con caucho, campos de juego y superficies deportivas, pisos de seguridad para parques infantiles y en la industria de la construcción.

Las partículas de neumático tienen una forma irregular y un tamaño que varía desde micras hasta varios milímetros. Están compuestas principalmente de caucho y contienen una variedad de otros materiales, como metales, fibra de vidrio y aditivos químicos. La composición de las partículas de neumático puede variar según el tipo de neumático original y el proceso utilizado para producir las partículas.

En términos de impacto ambiental, las partículas de neumático pueden presentar preocupaciones debido a la liberación de sustancias tóxicas durante su fabricación y el posible lixiviado de componentes durante su uso. Sin embargo, en la actualidad se están realizando investigaciones para comprender mejor los riesgos asociados con las partículas de neumático y se están desarrollando tecnologías para reducir su impacto ambiental. En general, la utilización de partículas de neumático recicladas puede ayudar a reducir la cantidad de neumáticos de desecho en vertederos y promover la economía circular.

*Q9. Dime los riesgos de partículas de desgaste de neumáticos en suelos agrícolas. Limita a 200 pala-bras.*

Las partículas de desgaste de neumáticos pueden contener una variedad de sustancias, incluyendo metales pesados, aditivos químicos y residuos de combustibles. Si estas partículas se depositan en suelos agrícolas, pueden tener efectos negativos en la calidad del suelo y la salud de las plantas, los animales y los seres humanos.

Uno de los principales riesgos de las partículas de desgaste de neumáticos en suelos agrícolas es la contaminación del suelo. Los metales pesados y otros contaminantes presentes en las partículas pueden acumularse en el suelo y afectar la calidad del suelo, así como la salud de las plantas que crecen en él. Además, la presencia de contaminantes en el suelo puede ser transferida a los productos agrícolas y, en última instancia, a los seres humanos a través de la cadena alimentaria.

Otro riesgo potencial es la alteración de la estructura del suelo. Las partículas de desgaste de neumáticos pueden afectar la porosidad y la permeabilidad del suelo, lo que puede disminuir la capacidad del suelo para retener agua y nutrientes. Esto puede tener efectos negativos en la salud y el crecimiento de las plantas.

Además, la presencia de partículas de desgaste de neumáticos en suelos agrícolas también puede tener un impacto negativo en la salud de los animales que pastan en esas áreas.

En general, se necesita una mayor investigación para comprender mejor los riesgos de las partículas de desgaste de neumáticos en suelos agrícolas y desarrollar estrategias efectivas para minimizar su impacto en el medio ambiente y la salud humana.

*Q9. (second run): Dime los riesgos de partículas de desgaste de neumáticos en suelos agrícolas. Limita a 200 pala-bras.*

Las partículas de desgaste de neumáticos en suelos agrícolas pueden presentar riesgos ambientales y para la salud. Estas partículas están compuestas de caucho, metales, aditivos químicos y otros materiales, y se liberan en el suelo durante el uso de vehículos agrícolas equipados con neumáticos. Algunos de los riesgos asociados con las partículas de desgaste de neumáticos en suelos agrícolas incluyen:

1. Contaminación del suelo: Las partículas de desgaste de neumáticos pueden acumularse en el suelo y contaminarlo con sustancias tóxicas como el zinc, el plomo y otros metales pesados. Esto puede tener un impacto negativo en la calidad del suelo y en la salud de los cultivos que se cultivan en él.

2. Contaminación del agua: Las partículas de desgaste de neumáticos pueden lixiviar del suelo y contaminar las fuentes de agua subterránea y superficial cercanas, lo que puede afectar negativamente a la calidad del agua y a la vida acuática.

3. Impacto en la salud humana: Las partículas de desgaste de neumáticos pueden ser inhaladas por las personas y los animales y pueden causar problemas respiratorios, así como otros problemas de salud.

4. Impacto en la biodiversidad: Las partículas de desgaste de neumáticos pueden tener un impacto negativo en la biodiversidad del suelo y en la vida silvestre que depende de él.

Para mitigar estos riesgos, se están desarrollando tecnologías y prácticas agrícolas sostenibles que reducen la emisión de partículas de desgaste de neumáticos, como el uso de neumáticos de baja presión, el uso de superficies de rodadura suaves y el control de la velocidad del vehículo. Además, es importante realizar una gestión adecuada de los neumáticos de desecho para minimizar su impacto en el medio ambiente y en la salud humana y animal.

### S3.6. Turkish

*Q5. Toprakta mikroplastik konsantrasyonu nedir? 200 kelime ile sınırla.*

Toprakta mikroplastik konsantrasyonu, mikroplastiklerin biriktikleri ve toprağın çeşitli bileşenlerinde gömülü oldukları yerlere göre değişkenlik gösterir. Mikroplastikler, tekstil atıkları, kozmetik ürünler, ambalaj malzemeleri, endüstriyel atıklar ve tarımsal faaliyetler gibi kaynaklardan toprağa karışabilirler.

Yapılan araştırmalar, dünya genelinde topraklarda mikroplastiklerin varlığını göstermektedir. Konsantrasyonlar, çevresel koşullara ve kaynaklara bağlı olarak büyük farklılıklar göstermektedir. Genellikle 1 kg toprakta yaklaşık 100-10.000 adet mikroplastik tanesi tespit edilmiştir.

Mikroplastiklerin toprakta birikmesi, toprağın fiziksel, kimyasal ve biyolojik özelliklerini değiştirebilir. Bu da toprak verimliliğinde azalmaya, bitki büyümesinde düşüşe ve toprağın su tutma kapasitesinde azalmaya neden olabilir. Ayrıca, mikroplastikler toprak mikroorganizmaları ve diğer canlılar için potansiyel bir tehdit oluşturabilirler.

Mikroplastik kirliliğinin etkilerini azaltmak için, kaynak azaltma ve geri dönüşüm gibi önleyici tedbirler alınmalıdır. Ayrıca, toprakta biriken mikroplastiklerin etkilerini azaltmak için, organik tarım uygulamaları ve toprak düzenlemesi gibi sürdürülebilir tarım uygulamaları da önerilmektedir.

Sonuç olarak, toprakta mikroplastik konsantrasyonu, kaynaklara ve çevresel koşullara bağlı olarak değişkenlik gösterir ve toprak verimliliği ve biyolojik çeşitlilik gibi önemli ekolojik süreçleri etkileyebilir. Bu nedenle, mikroplastik kirliliğinin azaltılması ve kontrol altına alınması için önleme, geri dönüşüm ve sürdürülebilir tarım uygulamaları gibi çözümler geliştirilmelidir.

*Q5. (second run) Toprakta mikroplastik konsantrasyonu nedir? 200 kelime ile sınırla.*

Toprakta mikroplastik konsantrasyonu, toprakta biriken mikroplastik parçacıklarının yoğunluğudur. Mikroplastikler, plastiklerin doğada parçalanması veya çeşitli kaynaklardan



toprağa karışması sonucu oluşur. Tarım faaliyetleri, sanayi atıkları, ambalaj malzemeleri ve tekstil atıkları gibi kaynaklardan kaynaklanabilir.

Mikroplastiklerin toprakta birikmesi, toprağın yapısını ve özelliklerini değiştirebilir. Bu da bitki büyümesi ve verimlilik üzerinde olumsuz etkilere neden olabilir. Toprakta biriken mikroplastikler, toprak mikroorganizmaları ve diğer canlılar için de potansiyel bir tehdit oluşturabilirler.

Dünya genelinde yapılan araştırmalar, toprakta mikroplastik kirliliğinin varlığını göstermektedir. Konsantrasyonlar, kaynaklara, toprak tipine ve coğrafi konuma bağlı olarak farklılık gösterir. Bazı araştırmalar, topraklarda mikroplastiklerin yoğunluğunun 1 kg toprakta 100-10.000 adet arasında değiştiğini göstermektedir.

Mikroplastik kirliliğinin etkilerini azaltmak için, kaynak azaltma, geri dönüşüm ve sürdürülebilir tarım uygulamaları gibi önleyici tedbirler alınabilir. Ayrıca, toprakta biriken mikroplastiklerin etkilerini azaltmak için, organik tarım uygulamaları ve toprak düzenlemesi gibi sürdürülebilir tarım uygulamaları da önerilmektedir.

Sonuç olarak, toprakta mikroplastik konsantrasyonu, mikroplastik kirliliğinin önemli bir göstergesidir ve toprak verimliliği ve biyolojik çeşitlilik gibi önemli ekolojik süreçleri etkileyebilir. Bu nedenle, mikroplastik kirliliğinin azaltılması ve kontrol altına alınması için önleme, geri dönüşüm ve sürdürülebilir tarım uygulamaları gibi çözümler geliştirilmelidir.

*Q6. Bir lastik parçacığı nelerden oluşur? 200 kelime ile sınırla.*

Bir lastik parçacığı, zamanla aşındıkça lastiğin yüzeyinden salınan kauçuk parçacığıdır. Lastik parçacıkları, lastik türüne, yol yüzeyine ve diğer faktörlere bağlı olarak boyut, şekil ve bileşim açısından değişebilir.

Lastik parçacıkları genellikle doğal ve sentetik kauçuk, karbon siyahı, yağ ve imalat sürecinde kullanılan çeşitli kimyasalların bir karışımından oluşur. Bu parçacıklar birkaç mikrondan birkaç milimetreye kadar değişebilir ve yollardan akan sular, doğrudan atmosferik sedimentasyon ve lastik parçacıkları içeren kompost veya diğer organik malzemelerin kullanımı gibi birkaç yolla çevreye salınabilir.

Yapılan çalışmalar, lastik parçacıklarının mikroplastikler ve diğer potansiyel olarak zararlı maddeleri ekosisteme sokarak insan sağlığı ve çevre açısından risk oluşturabileceğini göstermiştir. Kauçuk parçacıklarının yanı sıra, lastik parçacıkları ayrıca ağır metaller, polisiklik aromatik hidrokarbonlar (PAH'ler) ve diğer kimyasallar gibi maddeler içerebilir. Bu maddeler çevrede birikerek insan sağlığı ve çevre için risk oluşturabilir.

Sonuç olarak, lastik parçacıkları, çevreye salındıkları koşullara ve lastik türüne bağlı olarak değişebilen karmaşık bir bileşime sahiptir. İnsan sağlığı ve çevre üzerindeki potansiyel etkilerini daha iyi anlamak için daha fazla araştırmaya ihtiyaç vardır.

*Q6. (second run) Bir lastik parçacığı nelerden oluşur? 200 kelime ile sınırla.*

Bir lastik parçacığı, bir lastiğin aşınması sonucu yüzeyinden salınan küçük bir kauçuk parçacığdır. Lastik parçacıkları, lastik tipine, yol yüzeyine ve diğer faktörlere bağı olarak boyut, şekil ve bileşim açısından değışebilir.

Genellikle lastik parçacıkları doğal ve sentetik kauçuk, karbon siyahı, yağ ve imalat sürecinde kullanılan çeşitli kimyasalların karışımından oluşur. Bu parçacıklar, birkaç mikrondan birkaç milimetreye kadar değışen boyutlarda olabilir ve yollardan akan sular, doğrudan atmosferik sedimentasyon ve lastik parçacıkları içeren kompost veya diğer organik malzemelerin kullanımı gibi birkaç yolla çevreye salınabilir.

Yapılan çalışmalar, lastik parçacıklarının mikropplastikler ve diğer potansiyel olarak zararlı maddeleri ekosisteme sokarak insan sağığı ve çevre açısından risk oluşturabileceğini göstermiştir. Lastik parçacıkları, ayrıca ağır metaller, polisiklik aromatik hidrokarbonlar (PAH'ler) ve diğer kimyasallar gibi maddeler içerebilir. Bu maddeler çevrede birikerek insan sağığı ve çevre için risk oluşturabilir.

Sonuç olarak, lastik parçacıkları, lastik tipine ve salındıkları koşullara bağı olarak değışen karmaşık bir bileşime sahiptir. İnsan sağığı ve çevre üzerindeki potansiyel etkilerini daha iyi anlamak için daha fazla araştırmaya ihtiyaç vardır.

*Q9. Lastik parçacıklarının tarım toprakları üzerinde riski nedir? 200 kelime ile sınırla.*

Tarım toprakları, lastik parçacıklarının biriktiğı alanlardan biridir. Bu parçacıklar, traktörler ve diğer tarım makinelerinin lastiklerinin aşınmasından kaynaklanan havaya yayılan tozlar, yollardan gelen çamur veya tarım arazilerinde bulunan atık lastiklerin doğrudan kullanımı sonucu toprağı karışabilirler.

Lastik parçacıkları, tarım topraklarında bitkilerin büyümesini etkileyebilir ve bu da verimlilik kaybına neden olabilir. Bununla birlikte, tarım topraklarındaki lastik parçacıklarının insan sağığı ve çevre üzerindeki potansiyel etkileri konusunda yeterli araştırma bulunmamaktadır. Ancak, yapılan bazı çalışmalar lastik parçacıklarının toprak mikroorganizmaları, su kalitesi ve bitkiler üzerinde olumsuz etkileri olduğunu göstermektedir.

Lastik parçacıklarının tarım toprakları üzerindeki etkilerini azaltmak için, özellikle lastik aşınması sonucu yollara saçılan toz ve çamurların tarım arazilerine taşınması engellenmelidir. Atık lastiklerin doğrudan kullanımı yerine, geri dönüştürülmesi veya uygun şekilde imha edilmesi önerilir. Tarım araçlarının bakımı, düzenli lastik değışimi ve yolların düzenli temizliğı de lastik parçacıklarının tarım topraklarına taşınmasını azaltabilir.

Sonuç olarak, tarım topraklarındaki lastik parçacıklarının insan sağığı ve çevre üzerindeki potansiyel etkilerini belirlemek için daha fazla araştırmaya ihtiyaç vardır. Ancak, bu parçacıkların bitki büyümesini etkileyebileceğı ve verimlilik kaybına neden olabileceğı bilinmektedir.

*Q9. (second run) Lastik parçacıklarının tarım toprakları üzerinde riski nedir? 200 kelime ile sınırla.*

Tarım toprakları, lastik parçacıklarının biriktiğı alanlardan biridir. Bu parçacıklar, traktörler ve diğer tarım makinelerinin lastiklerinin aşınmasından kaynaklanan havaya yayılan tozlar,



yollardan gelen çamur veya tarım arazilerinde bulunan atık lastiklerin doğrudan kullanımı sonucu toprağa karışabilirler.

Lastik parçacıkları, tarım topraklarında bitkilerin büyümesini etkileyebilir ve bu da verimlilik kaybına neden olabilir. Bununla birlikte, tarım topraklarındaki lastik parçacıklarının insan sağlığı ve çevre üzerindeki potansiyel etkileri konusunda yeterli araştırma bulunmamaktadır. Ancak, yapılan bazı çalışmalar lastik parçacıklarının toprak mikroorganizmaları, su kalitesi ve bitkiler üzerinde olumsuz etkileri olduğunu göstermektedir.

Lastik parçacıklarının tarım toprakları üzerindeki etkilerini azaltmak için, özellikle lastik aşınması sonucu yollara saçılan toz ve çamurların tarım arazilerine taşınması engellenmelidir. Atık lastiklerin doğrudan kullanımı yerine, geri dönüştürülmesi veya uygun şekilde imha edilmesi önerilir. Tarım araçlarının bakımı, düzenli lastik değişimi ve yolların düzenli temizliği de lastik parçacıklarının tarım topraklarına taşınmasını azaltabilir.

Sonuç olarak, tarım topraklarındaki lastik parçacıklarının insan sağlığı ve çevre üzerindeki potansiyel etkilerini belirlemek için daha fazla araştırmaya ihtiyaç vardır. Ancak, bu parçacıkların bitki büyümesini etkileyebileceği ve verimlilik kaybına neden olabileceği bilinmektedir.

## Section S4. Answers limited to 400 words.

*Q4. What is the difference between primary and secondary MPs? Limit to 400 words.*

Microplastics (MPs) are small plastic particles measuring less than 5mm in diameter, and they are widely distributed in the environment. There are two main types of microplastics: primary and secondary microplastics. Understanding the differences between these two types of microplastics is crucial for developing effective strategies to mitigate their impact on the environment.

Primary microplastics are manufactured plastic particles and are intentionally added to products such as cosmetics, cleaning agents, and exfoliating scrubs. These products are designed to be used and then rinsed off, and the plastic particles are often too small to be effectively filtered out during wastewater treatment processes. Primary microplastics can also be released during the production and processing of plastic products, as well as through the wear and tear of plastic products such as tires.

In contrast, secondary microplastics are formed through the breakdown of larger plastic items such as plastic bags, bottles, and packaging. This breakdown can occur due to exposure to UV radiation, heat, and physical abrasion. Secondary microplastics can also result from the fragmentation of primary microplastics that have been released into the environment. As secondary microplastics are formed from the breakdown of larger plastic items, they can contain a range of chemical additives and other contaminants that were present in the original plastic product.

The main difference between primary and secondary microplastics is their source. Primary microplastics are intentionally manufactured and added to products, whereas secondary microplastics are a result of the degradation of larger plastic items. As a result, primary microplastics are often smaller in size and more uniform in shape, while secondary microplastics can have a range of shapes and sizes.

Another difference between the two types of microplastics is their relative abundance in the environment. While primary microplastics make up a significant portion of the total amount of microplastics in the environment, secondary microplastics are thought to be the most common type of microplastics found in the environment.

In summary, primary and secondary microplastics differ in their source, size, and shape. Both types of microplastics are a growing concern due to their potential impact on the environment and human health. Developing effective strategies to mitigate the release of both types of microplastics into the environment is essential to minimize their impact on the ecosystem.

*Q4. (second run). What is the difference between primary and secondary MPs? Limit to 400 words.*

Microplastics (MPs) are small pieces of plastic, less than 5 mm in size, that have become a significant environmental concern due to their widespread distribution and potential impact on the ecosystem and human health. MPs can be categorized as primary or secondary based on their origin and mode of production.

Primary MPs are intentionally produced plastic particles used in various applications, such as personal care products, industrial abrasives, and microbeads in cleaning products. These plastic particles are typically spherical and have a uniform size distribution. Primary MPs can enter the environment through wastewater treatment plants, where they are not effectively removed, and can ultimately accumulate in aquatic ecosystems.

Secondary MPs, on the other hand, are formed through the degradation of larger plastic items, such as bottles, bags, and fishing nets, which break down into smaller particles over time. These plastic fragments can be further degraded into smaller particles through mechanical or environmental processes, such as UV radiation and wave action. Secondary MPs can also enter the environment through various pathways, such as urban runoff, wind transport, and atmospheric deposition.

The key difference between primary and secondary MPs lies in their origin and physical properties. Primary MPs are intentionally produced and have a uniform size and shape, while secondary MPs are formed through the degradation of larger plastic items and have a more varied size and shape distribution. Primary MPs are typically smaller than secondary MPs, ranging from a few micrometers to a few millimeters, while secondary MPs can range from a few micrometers to several centimeters in size.

Furthermore, the environmental impact of primary and secondary MPs may differ depending on their physical properties and mode of entry into the ecosystem. Primary MPs can enter aquatic ecosystems directly through wastewater effluent or indirectly through the food chain, where they can accumulate in higher trophic levels. Secondary MPs, on the other hand, can enter the ecosystem through various pathways, such as atmospheric deposition and runoff, and may have a more widespread distribution in the environment.

In summary, the main difference between primary and secondary MPs lies in their origin and physical properties. Primary MPs are intentionally produced plastic particles used in various applications, while secondary MPs are formed through the degradation of larger plastic items. Primary MPs are typically smaller and more uniform in size and shape, while secondary MPs

have a more varied size and shape distribution. The environmental impact of primary and secondary MPs may differ depending on their physical properties and mode of entry into the ecosystem.

*Q5. What is the concentration of MPs in soils? Limit to 400 words.*

Microplastics (MPs) are small plastic particles measuring less than 5mm in diameter. They are widely distributed in the environment and are a growing concern due to their potential adverse effects on wildlife and human health. One major pathway for MPs to enter the environment is through the disposal of plastic waste on land, which can subsequently contaminate soils. The concentration of MPs in soils has been a topic of much research in recent years.

Studies have reported a wide range of concentrations of MPs in soils, depending on the sampling location, land use, and plastic types. For example, a study in China found that the average concentration of MPs in urban soils was 23.5 particles per gram of dry weight soil, while rural soils had an average concentration of 5.5 particles per gram of dry weight soil. Another study in Germany found that the concentration of MPs in agricultural soils ranged from 25 to 150 particles per gram of dry weight soil. Similarly, a study in the United Kingdom found that the concentration of MPs in allotment soils ranged from 0 to 50 particles per gram of dry weight soil.

The size of the MPs can also vary and have an impact on their concentration. For instance, a study conducted in Canada revealed that the highest concentration of MPs was found in soils with particles sizes ranging from 0.5-1mm, with concentrations ranging from 220 to 310 particles per gram of dry weight soil. In contrast, soils with particle sizes larger than 1mm had concentrations ranging from 10 to 70 particles per gram of dry weight soil.

The type of plastic is also an essential factor in determining the concentration of MPs in soils. Polyethylene, polypropylene, and polystyrene are the most common plastic types found in soils. A study in the United States found that the concentration of MPs in agricultural soils was highest for polyethylene particles, followed by polystyrene and polypropylene particles.

In summary, the concentration of MPs in soils varies depending on a range of factors, including sampling location, land use, particle size, and plastic type. The levels of contamination of MPs in soil are a growing concern due to their potential adverse impacts on soil health and the wider ecosystem. Further research is needed to understand the potential effects of MPs on soil organisms and ecosystems and to develop effective strategies to mitigate their impacts.

*Q5.(second run) What is the concentration of MPs in soils? Limit to 400 words.*

The concentration of microplastics (MPs) in soils is a growing concern due to their potential impact on the environment and human health. Microplastics can enter soils through a variety of pathways, including agricultural practices, landfills, and wastewater irrigation. Understanding the concentration of MPs in soils is important for assessing their impact on soil health and developing effective strategies to reduce their release.

Studies have shown that the concentration of MPs in soils varies widely depending on factors such as location, land use, and soil type. In general, urban and industrial areas have been found to have higher concentrations of MPs in soils than rural areas. However, even in rural areas, MPs can be present due to the use of plastic mulches, the application of biosolids, and the use of plastic packaging in agriculture.

The concentration of MPs in soils is typically measured in terms of the number of particles per unit weight of soil or per unit volume of soil. Most studies use a sieving method to separate the MPs from the soil, followed by chemical digestion or microscopy to identify and quantify the particles. The size of the MPs can also vary widely, with particles ranging from a few micrometers to several millimeters in diameter.

A review of studies conducted worldwide found that the concentration of MPs in soils ranged from 2 to 6000 particles per gram of dry soil, with an average concentration of 43 particles per gram of dry soil. However, it is important to note that the concentration of MPs in soils can vary widely depending on the location and sampling method used. For example, a study conducted in China found concentrations of up to 1440 particles per gram of dry soil in urban areas, while a study conducted in France found concentrations of up to 300 particles per gram of dry soil in agricultural areas.

In addition to the concentration of MPs in soils, it is also important to consider the distribution and characteristics of the particles. Studies have shown that MPs tend to accumulate in the topsoil layer, and that the size and shape of the particles can affect their mobility and bioavailability. Furthermore, MPs can adsorb pollutants and other chemicals, potentially increasing their toxicity and impact on soil health.

In conclusion, the concentration of microplastics in soils varies widely depending on location, land use, and soil type. Most studies use a sieving method to separate the MPs from the soil, followed by chemical digestion or microscopy to identify and quantify the particles. While the average concentration of MPs in soils is relatively low, their impact on soil health and ecosystem functioning is not yet fully understood, and further research is needed to assess their potential risks and develop effective strategies to reduce their release.

*Q8. How to calculate the release of tire wear particles from a car ride? Write 400 words.*

Tire wear particles (TWPs) are a type of microplastic that can be released into the environment during the use of motor vehicles. These particles can be harmful to the environment and human health, and understanding their release is essential to develop effective strategies to reduce their impact. There are several factors that affect the release of TWPs during a car ride, including tire size, tire pressure, road surface, and driving conditions. Calculating the release of TWPs during a car ride requires several steps.

Step 1: Calculate the mass of the tire wear particles

The first step in calculating the release of TWPs during a car ride is to determine the mass of the particles released. This can be done by measuring the mass of the tire before and after the ride and subtracting the difference. The mass loss of the tire represents the mass of the TWPs released during the ride.

Step 2: Calculate the surface area of the tire

The surface area of the tire can be calculated using the formula for the surface area of a cylinder. The formula is:

$$\text{Surface Area} = 2\pi r^2 + 2\pi rh$$

Where  $r$  is the radius of the tire and  $h$  is the height of the tire.

Step 3: Determine the wear rate of the tire

The wear rate of the tire can be calculated by dividing the mass of the TWPs released by the surface area of the tire. This gives the wear rate in units of mass per surface area.

$\text{Wear Rate} = \text{Mass of TWPs released} / \text{Surface Area of the tire}$

Step 4: Determine the distance traveled by the vehicle

The distance traveled by the vehicle during the ride can be determined using GPS or by measuring the distance using a map.

Step 5: Calculate the release rate of TWPs

The release rate of TWPs during the car ride can be calculated by multiplying the wear rate of the tire by the distance traveled by the vehicle. This gives the release rate in units of mass per distance traveled.

$\text{Release Rate} = \text{Wear Rate} \times \text{Distance Traveled}$

This calculation provides an estimate of the amount of TWPs released during the car ride. However, it is important to note that this calculation may not take into account all factors that affect the release of TWPs, such as road surface conditions and driving behavior. Furthermore, this calculation assumes that all TWPs are released during the car ride, which may not be the case.

In conclusion, calculating the release of TWPs during a car ride requires several steps, including determining the mass of the particles released, calculating the surface area of the tire, determining the wear rate of the tire, determining the distance traveled by the vehicle, and calculating the release rate of TWPs. This calculation can provide an estimate of the amount of TWPs released during a car ride, but further research is needed to fully understand the release of TWPs and develop effective strategies to mitigate their impact on the environment and human health.

*Q8. (second run) How to calculate the release of tire wear particles from a car ride? Write 400 words.*

Tire wear particles (TWPs) are a significant source of microplastic pollution, and their release into the environment has been shown to contribute to the accumulation of microplastics in waterways and soils. TWPs are generated during the normal use of tires and are released into the environment through various pathways, including surface runoff, atmospheric deposition, and direct deposition onto road surfaces. Calculating the release of TWPs from a car ride involves several factors that can be estimated using empirical data and modeling approaches.

The release of TWPs from a car ride can be estimated by considering factors such as the distance traveled, tire wear rate, and road surface type. The distance traveled can be determined based on the vehicle's speed and travel time, while the tire wear rate can be estimated based on the tire

type, age, and inflation pressure. The road surface type can also be a critical factor in determining the release of TWPs, as rougher road surfaces can increase tire wear and particle release.

To estimate the release of TWPs from a car ride, empirical data on tire wear rates and particle release can be used. For example, laboratory experiments can be conducted to measure the amount of TWPs released from tires under different conditions, such as varying speeds and road surface types. These data can then be used to develop models that estimate the amount of TWPs released based on the factors mentioned above.

Another approach to estimating the release of TWPs from a car ride is through the use of atmospheric deposition models. These models simulate the transport and deposition of airborne particles, including TWPs, over time and space. The models can incorporate factors such as wind speed, atmospheric conditions, and emission rates to estimate the deposition of TWPs onto various surfaces, such as roads, buildings, and vegetation.

In addition to empirical data and modeling approaches, field measurements can also be conducted to estimate the release of TWPs from a car ride. These measurements can involve collecting samples of road dust and air particulate matter and analyzing them for the presence of TWPs. By comparing the concentration of TWPs in these samples before and after a car ride, the amount of TWPs released can be estimated.

In conclusion, estimating the release of TWPs from a car ride involves several factors, including the distance traveled, tire wear rate, and road surface type. Empirical data and modeling approaches, such as atmospheric deposition models, can be used to estimate the release of TWPs from a car ride. Field measurements can also be conducted to validate these estimates. Understanding the release of TWPs from car rides is crucial in developing effective strategies to reduce microplastic pollution and protect the environment and human health.

## REFERENCES

- Chai, B., Wei, Q., She, Y., Lu, G., Dang, Z., Yin, H. (2020). Soil microplastic pollution in an e-waste dismantling zone of China. *Waste Manag*, 118, 291–301. <https://doi.org/10.1016/j.wasman.2020.08.048>
- Chen, Y., Leng, Y., Liu, X., Wang, J. (2020). Microplastic pollution in vegetable farmlands of suburb Wuhan, central China. *Environ. Pollut.*, 257, 113449. <https://doi.org/10.1016/j.envpol.2019.113449>
- Crossman, J., Hurley, R. R., Futter, M., & Nizzetto, L. (2020). Transfer and transport of microplastics from biosolids to agricultural soils and the wider environment. *Science of the Total Environment*, 724, 138334. <https://doi.org/10.1016/j.scitotenv.2020.138334>
- Harms, I. K., Diekötter, T., Troegel, S., Lenz, M. (2021). Amount, distribution and composition of large microplastics in typical agricultural soils in Northern Germany. *Sci. Total Environ.*, 758, 143615. <https://doi.org/10.1016/j.scitotenv.2020.143615>
- Isari, E. A., Papaioannou, D., Kalavrouziotis, I. K., Karapanagioti, H. K. 2021. Microplastics in agricultural soils: A case study in cultivation of watermelons and canning tomatoes. *Water (Switzerland)*, 13(16). <https://doi.org/10.3390/w13162168>
- Scheurer, M., Bigalke, M., (2018). Microplastics in Swiss Floodplain Soils. *Environ. Sci. Technol.* 52, 3591–3598. <https://doi.org/10.1021/acs.est.7b06003>
- Tunali, M., Adam, V., & Nowack, B. (2023). Probabilistic environmental risk assessment of microplastics in soils. *Geoderma*, 430 (December 2022). <https://doi.org/10.1016/j.geoderma.2022.116315>
- Zhou, Y., Liu, X., Wang, J., (2019). Characterization of microplastics and the association of heavy metals with microplastics in suburban soil of central China. *Sci. Total Environ.* 694, 133798. <https://doi.org/10.1016/j.scitotenv.2019.133798>
