# Supplementary material for: Conversational AI Tools for Environmental Topics: A Comparative Analysis of Different Tools and Languages for Microplastics, Tire Wear Particles, Engineered Nanoparticles and Advanced Materials
Source: MDPI journal article supplement (doi:10.3390/su151914453), 2023-10-03
Supplement: s1 [file s1]

Archive with 1 entries (1 files):
- sustainability-2608690-supplementary.pdf
